# Supplementary material for: Theoretical study on the mechanism and enantioselectivity of NHC-catalyzed intramolecular SN2′ nucleophilic substitution: what are the roles of NHC and DBU?
Source: Royal Society of Chemistry journal article supplement (doi:10.1039/c8qo00129d), 2018-01-01
Supplement: c8qo00129d1.pdf [file c8qo00129d1.pdf]

## Electronic Supporting Information for

# Theoretical study on mechanism and enantioselectivity of NHC-catalyzed intramolecular S<sub>N</sub>2' nucleophilic substitution: what are roles of NHC and DBU

Huimin Zhang, Hao Xu, Huining Bai, Donghui Wei, Yanyan Zhu, and Wenjing Zhang\*  
College of Chemistry and Molecular Engineering, Zhengzhou University, Zhengzhou, Henan  
Province 450001, P. R. China

## Content

|                                                                                            |          |
|--------------------------------------------------------------------------------------------|----------|
| <b>Part 1: The absolute energies of all structures involved in this study.....</b>         | <b>2</b> |
| <b>Part 2: The scanning curve to the N9–H5 bond in the DBPT pathway.....</b>               | <b>3</b> |
| <b>Part 2: List of Cartesian coordinates of all structures involved in this work .....</b> | <b>4</b> |

---

\* Corresponding author: [zhangwj@zzu.edu.cn](mailto:zhangwj@zzu.edu.cn) (W.-J. Zhang)

**Part 1: The absolute energies of all structures involved in this study.**

**Table S1.** Thermal correction to Gibbs free energies ( $G_{\text{Thermo}}$ ) calculated at Level A, Born-Oppenheimer energies calculated at Level A ( $E_A$ ) and Level B ( $E_B$ ) of all structures involved in this study (Unit: a.u.)

|                          | $G_{\text{Thermo}}$ | $E_A$        | $E_B$        |
|--------------------------|---------------------|--------------|--------------|
| <b>R</b>                 | 0.16897             | -8329.40606  | -8336.77183  |
| <b>NHC</b>               | 0.22399             | -1429.98877  | -1430.48420  |
| <b>DBU</b>               | 0.22290             | -461.89648   | -462.03444   |
| <b>DBU-H<sup>+</sup></b> | 0.23826             | -462.37024   | -462.50283   |
| <b>Si-TS1</b>            | 0.41710             | -9759.40975  | -9767.25540  |
| <b>Re-TS1</b>            | 0.41747             | -9759.40919  | -9767.25232  |
| <b>Si-Int1</b>           | 0.41711             | -9759.41171  | -9767.25923  |
| <b>Re-Int1</b>           | 0.41863             | -9759.41774  | -9767.26363  |
| <b>Re-TS6'</b>           | 0.41131             | -9759.37542  | -9767.21406  |
| <b>Si-TS6'</b>           | 0.41289             | -9759.37470  | -9767.22166  |
| <b>Re-Int6'</b>          | 0.41500             | -9759.43256  | -9767.27921  |
| <b>Si-Int6'</b>          | 0.41713             | -9759.44929  | -9767.29437  |
| <b>TS2</b>               | 0.41328             | -9759.34617  | -9767.19593  |
| <b>Int2</b>              | 0.41861             | -9759.43316  | -9767.27965  |
| <b>TS3</b>               | 0.65534             | -10221.28678 | -10229.26849 |
| <b>Int3</b>              | 0.66308             | -10221.33033 | -10229.31225 |
| <b>Int4</b>              | 0.67244             | -10221.82644 | -10229.79688 |
| <b>TS4</b>               | 0.67340             | -10221.82814 | -10229.79714 |
| <b>Int5</b>              | 0.67237             | -10221.82644 | -10229.79645 |
| <b>TS5</b>               | 0.67055             | -10221.78553 | -10229.75830 |
| <b>TS6R</b>              | 0.41787             | -9759.38898  | -9767.23802  |
| <b>TS6S</b>              | 0.41931             | -9759.38903  | -9767.23596  |
| <b>Int6R</b>             | 0.42355             | -9759.46727  | -9767.31729  |
| <b>Int6S</b>             | 0.42393             | -9759.44207  | -9767.29251  |
| <b>TS7R</b>              | 0.41930             | -9759.44375  | -9767.29096  |
| <b>PR</b>                | 0.41516             | -9759.45647  | -9767.30442  |
| <b>HBr</b>               | 0.16239             | -5757.04604  | -5762.02175  |

**Part 2: The scanning curve to the N9–H5 bond in the DBPT pathway.**

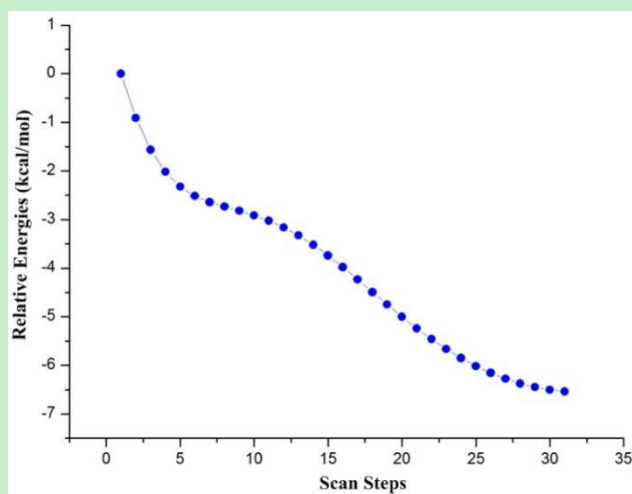

**Fig. S1** The flexible scanning curve to the bond of N9–H5. We start with the optimized structure of **Int3** and scan the N9–H5 bond by taking 30 steps of size 0.02 angstroms.

## Part 2: List of Cartesian coordinates of all structures involved in this work

### R

---

| Center<br>Number | Atomic<br>Number | Atomic<br>Type | Coordinates (Angstroms) |           |           |
|------------------|------------------|----------------|-------------------------|-----------|-----------|
|                  |                  |                | X                       | Y         | Z         |
| 1                | 6                | 0              | -1.619218               | 1.035618  | -0.283553 |
| 2                | 6                | 0              | -0.588281               | 0.088688  | -0.373097 |
| 3                | 6                | 0              | -0.930842               | -1.270826 | -0.302396 |
| 4                | 6                | 0              | -2.251028               | -1.661470 | -0.061422 |
| 5                | 6                | 0              | -3.239018               | -0.703137 | 0.061197  |
| 6                | 6                | 0              | -2.934347               | 0.649349  | -0.070384 |
| 7                | 1                | 0              | -3.712269               | 1.399954  | 0.001159  |
| 8                | 35               | 0              | -5.027170               | -1.217984 | 0.377301  |
| 9                | 35               | 0              | -1.232808               | 2.868674  | -0.466685 |
| 10               | 8                | 0              | 0.681997                | 0.529240  | -0.553201 |
| 11               | 6                | 0              | 1.716193                | 0.006634  | 0.289183  |
| 12               | 1                | 0              | 1.258313                | -0.568399 | 1.107407  |
| 13               | 1                | 0              | 2.344111                | -0.667913 | -0.301999 |
| 14               | 6                | 0              | 3.798406                | 0.843846  | 1.306839  |
| 15               | 1                | 0              | 4.415011                | 1.653516  | 1.687149  |
| 16               | 6                | 0              | 4.400001                | -0.519867 | 1.332703  |
| 17               | 1                | 0              | 5.242023                | -0.587654 | 2.016976  |
| 18               | 1                | 0              | 3.686586                | -1.310349 | 1.561886  |
| 19               | 35               | 0              | 5.142352                | -1.029029 | -0.430385 |
| 20               | 6                | 0              | 2.573828                | 1.121802  | 0.846194  |
| 21               | 6                | 0              | 2.000254                | 2.505158  | 0.869472  |
| 22               | 1                | 0              | 1.769030                | 2.845608  | -0.143372 |
| 23               | 1                | 0              | 1.054229                | 2.527484  | 1.420613  |
| 24               | 1                | 0              | 2.700012                | 3.200946  | 1.335346  |
| 25               | 6                | 0              | 0.050007                | -2.354871 | -0.597522 |
| 26               | 1                | 0              | 0.994825                | -2.042956 | -1.076246 |
| 27               | 8                | 0              | -0.184191               | -3.520806 | -0.386191 |
| 28               | 1                | 0              | -2.473142               | -2.721365 | -0.005138 |

---

### DBU

---

| Center<br>Number | Atomic<br>Number | Atomic<br>Type | Coordinates (Angstroms) |   |   |
|------------------|------------------|----------------|-------------------------|---|---|
|                  |                  |                | X                       | Y | Z |

---

|    |   |   |           |           |           |
|----|---|---|-----------|-----------|-----------|
| 1  | 6 | 0 | -0.919461 | -1.553239 | -0.108294 |
| 2  | 6 | 0 | 0.365004  | -0.740366 | -0.174017 |
| 3  | 6 | 0 | -2.003018 | -1.009966 | 0.824363  |
| 4  | 6 | 0 | -0.847780 | 1.509421  | -0.042523 |
| 5  | 6 | 0 | -2.901666 | 0.008547  | 0.119975  |
| 6  | 6 | 0 | -2.088849 | 0.972214  | -0.746603 |
| 7  | 1 | 0 | -1.322929 | -1.673740 | -1.121765 |
| 8  | 1 | 0 | -1.108503 | 1.811677  | 0.986166  |
| 9  | 1 | 0 | -1.525935 | -0.549610 | 1.697955  |
| 10 | 1 | 0 | -3.476210 | 0.575016  | 0.861688  |
| 11 | 1 | 0 | -0.586760 | -2.544156 | 0.202331  |
| 12 | 1 | 0 | -2.611177 | -1.835177 | 1.206386  |
| 13 | 1 | 0 | -0.529251 | 2.425833  | -0.556942 |
| 14 | 1 | 0 | -3.629756 | -0.513933 | -0.510903 |
| 15 | 1 | 0 | -2.712887 | 1.825137  | -1.031357 |
| 16 | 1 | 0 | -1.778666 | 0.492385  | -1.680977 |
| 17 | 6 | 0 | 1.546609  | 1.382771  | 0.259097  |
| 18 | 1 | 0 | 1.791356  | 2.020505  | -0.603761 |
| 19 | 1 | 0 | 1.349943  | 2.054662  | 1.106261  |
| 20 | 6 | 0 | 2.683895  | -0.687578 | -0.433671 |
| 21 | 1 | 0 | 3.513088  | -1.379991 | -0.263124 |
| 22 | 1 | 0 | 2.810352  | -0.279147 | -1.448576 |
| 23 | 6 | 0 | 2.708142  | 0.456238  | 0.574240  |
| 24 | 1 | 0 | 3.646538  | 1.016996  | 0.545332  |
| 25 | 1 | 0 | 2.593491  | 0.039284  | 1.580186  |
| 26 | 7 | 0 | 1.437520  | -1.425219 | -0.343545 |
| 27 | 7 | 0 | 0.322487  | 0.637507  | -0.028498 |

---

**DBU-H<sup>+</sup>**

---

| Center<br>Number | Atomic<br>Number | Atomic<br>Type | Coordinates (Angstroms) |           |           |
|------------------|------------------|----------------|-------------------------|-----------|-----------|
|                  |                  |                | X                       | Y         | Z         |
| 1                | 6                | 0              | -0.919461               | -1.553239 | -0.108294 |
| 2                | 6                | 0              | 0.365004                | -0.740366 | -0.174017 |
| 3                | 6                | 0              | -2.003018               | -1.009966 | 0.824363  |
| 4                | 6                | 0              | -0.847780               | 1.509421  | -0.042523 |
| 5                | 6                | 0              | -2.901666               | 0.008547  | 0.119975  |
| 6                | 6                | 0              | -2.088849               | 0.972214  | -0.746603 |

---

|    |   |   |           |           |           |
|----|---|---|-----------|-----------|-----------|
| 7  | 1 | 0 | -1.322929 | -1.673740 | -1.121765 |
| 8  | 1 | 0 | -1.108503 | 1.811677  | 0.986166  |
| 9  | 1 | 0 | -1.525935 | -0.549610 | 1.697955  |
| 10 | 1 | 0 | -3.476210 | 0.575016  | 0.861688  |
| 11 | 1 | 0 | -0.586760 | -2.544156 | 0.202331  |
| 12 | 1 | 0 | -2.611177 | -1.835177 | 1.206386  |
| 13 | 1 | 0 | -0.529251 | 2.425833  | -0.556942 |
| 14 | 1 | 0 | -3.629756 | -0.513933 | -0.510903 |
| 15 | 1 | 0 | -2.712887 | 1.825137  | -1.031357 |
| 16 | 1 | 0 | -1.778666 | 0.492385  | -1.680977 |
| 17 | 6 | 0 | 1.546609  | 1.382771  | 0.259097  |
| 18 | 1 | 0 | 1.791356  | 2.020505  | -0.603761 |
| 19 | 1 | 0 | 1.349943  | 2.054662  | 1.106261  |
| 20 | 6 | 0 | 2.683895  | -0.687578 | -0.433671 |
| 21 | 1 | 0 | 3.513088  | -1.379991 | -0.263124 |
| 22 | 1 | 0 | 2.810352  | -0.279147 | -1.448576 |
| 23 | 6 | 0 | 2.708142  | 0.456238  | 0.574240  |
| 24 | 1 | 0 | 3.646538  | 1.016996  | 0.545332  |
| 25 | 1 | 0 | 2.593491  | 0.039284  | 1.580186  |
| 26 | 7 | 0 | 1.437520  | -1.425219 | -0.343545 |
| 27 | 7 | 0 | 0.322487  | 0.637507  | -0.028498 |
| 28 | 1 | 0 | 1.415045  | -2.422721 | -0.410517 |

---

**NHC**

---

| Center<br>Number | Atomic<br>Number | Atomic<br>Type | Coordinates (Angstroms) |          |           |
|------------------|------------------|----------------|-------------------------|----------|-----------|
|                  |                  |                | X                       | Y        | Z         |
| 1                | 6                | 0              | -5.272594               | 2.568990 | -1.169682 |
| 2                | 6                | 0              | -3.957400               | 2.987022 | -0.974534 |
| 3                | 6                | 0              | -3.017911               | 2.137983 | -0.385934 |
| 4                | 6                | 0              | -3.433458               | 0.869674 | -0.012905 |
| 5                | 6                | 0              | -4.754036               | 0.434604 | -0.212729 |
| 6                | 6                | 0              | -5.681657               | 1.288144 | -0.791558 |
| 7                | 1                | 0              | -5.986689               | 3.244238 | -1.630126 |
| 8                | 1                | 0              | -3.659403               | 3.982974 | -1.285486 |
| 9                | 1                | 0              | -1.986747               | 2.437700 | -0.231100 |
| 10               | 1                | 0              | -6.704224               | 0.964074 | -0.960972 |
| 11               | 6                | 0              | 2.707364                | 0.787986 | 0.947180  |
| 12               | 6                | 0              | 4.040089                | 1.145250 | 0.789009  |

|    |   |   |           |           |           |
|----|---|---|-----------|-----------|-----------|
| 13 | 6 | 0 | 4.801686  | 0.553003  | -0.209297 |
| 14 | 6 | 0 | 4.228690  | -0.388359 | -1.054466 |
| 15 | 6 | 0 | 2.890818  | -0.725799 | -0.904326 |
| 16 | 6 | 0 | 2.116515  | -0.145785 | 0.098473  |
| 17 | 9 | 0 | 2.353714  | -1.603231 | -1.741715 |
| 18 | 9 | 0 | 4.956680  | -0.947165 | -2.015870 |
| 19 | 9 | 0 | 6.077796  | 0.886226  | -0.356454 |
| 20 | 9 | 0 | 4.594108  | 2.037389  | 1.603690  |
| 21 | 9 | 0 | 2.012574  | 1.342350  | 1.930154  |
| 22 | 6 | 0 | -3.470845 | -1.466475 | 0.177859  |
| 23 | 1 | 0 | -3.204068 | -1.605018 | -0.884253 |
| 24 | 8 | 0 | -3.108535 | -2.610673 | 0.912723  |
| 25 | 6 | 0 | -1.780557 | -2.990194 | 0.586621  |
| 26 | 1 | 0 | -1.434385 | -3.675238 | 1.362087  |
| 27 | 1 | 0 | -1.764251 | -3.519161 | -0.377115 |
| 28 | 6 | 0 | -0.845532 | -1.805041 | 0.490036  |
| 29 | 7 | 0 | -1.295400 | -0.498676 | 0.460890  |
| 30 | 7 | 0 | 0.440393  | -1.841995 | 0.356544  |
| 31 | 7 | 0 | 0.762282  | -0.499471 | 0.251800  |
| 32 | 6 | 0 | -0.266770 | 0.385407  | 0.321446  |
| 33 | 6 | 0 | -2.704413 | -0.244627 | 0.683504  |
| 34 | 1 | 0 | -2.868693 | -0.169846 | 1.768351  |
| 35 | 6 | 0 | -4.924772 | -1.005628 | 0.248839  |
| 36 | 1 | 0 | -5.599641 | -1.592174 | -0.377180 |
| 37 | 1 | 0 | -5.279690 | -1.058220 | 1.285914  |

---

***Si-TS1***

---

| Center<br>Number | Atomic<br>Number | Atomic<br>Type | Coordinates (Angstroms) |           |           |
|------------------|------------------|----------------|-------------------------|-----------|-----------|
|                  |                  |                | X                       | Y         | Z         |
| 1                | 6                | 0              | 4.600279                | 1.094605  | -2.101721 |
| 2                | 6                | 0              | 3.319193                | 1.527713  | -2.445536 |
| 3                | 6                | 0              | 2.248622                | 0.637363  | -2.442719 |
| 4                | 6                | 0              | 2.484001                | -0.679248 | -2.068540 |
| 5                | 6                | 0              | 3.772808                | -1.128937 | -1.752343 |
| 6                | 6                | 0              | 4.837227                | -0.234804 | -1.758943 |
| 7                | 1                | 0              | 5.419098                | 1.806237  | -2.089774 |
| 8                | 1                | 0              | 3.145291                | 2.571163  | -2.682630 |
| 9                | 1                | 0              | 1.247270                | 0.982880  | -2.686076 |

|    |    |   |           |           |           |
|----|----|---|-----------|-----------|-----------|
| 10 | 1  | 0 | 5.837985  | -0.568536 | -1.501734 |
| 11 | 6  | 0 | -3.909978 | -0.918157 | -0.847961 |
| 12 | 6  | 0 | -5.095952 | -0.506191 | -0.256188 |
| 13 | 6  | 0 | -5.289875 | -0.723799 | 1.099717  |
| 14 | 6  | 0 | -4.306528 | -1.343094 | 1.868159  |
| 15 | 6  | 0 | -3.122897 | -1.734281 | 1.271201  |
| 16 | 6  | 0 | -2.922466 | -1.512575 | -0.084456 |
| 17 | 9  | 0 | -2.154374 | -2.279801 | 1.996340  |
| 18 | 9  | 0 | -4.509653 | -1.537529 | 3.167657  |
| 19 | 9  | 0 | -6.424745 | -0.344288 | 1.674172  |
| 20 | 9  | 0 | -6.036534 | 0.086926  | -0.980093 |
| 21 | 9  | 0 | -3.711778 | -0.709158 | -2.144532 |
| 22 | 6  | 0 | 2.331546  | -2.941680 | -1.301955 |
| 23 | 1  | 0 | 2.088099  | -2.774968 | -0.242191 |
| 24 | 8  | 0 | 1.938359  | -4.238264 | -1.695591 |
| 25 | 6  | 0 | 0.533655  | -4.399569 | -1.881659 |
| 26 | 1  | 0 | 0.347246  | -4.600014 | -2.944230 |
| 27 | 1  | 0 | 0.185889  | -5.261092 | -1.306034 |
| 28 | 6  | 0 | -0.278529 | -3.205718 | -1.459909 |
| 29 | 7  | 0 | 0.208721  | -1.921548 | -1.587494 |
| 30 | 7  | 0 | -1.452644 | -3.203587 | -0.911936 |
| 31 | 7  | 0 | -1.684629 | -1.877403 | -0.675136 |
| 32 | 6  | 0 | -0.676382 | -1.062385 | -1.033883 |
| 33 | 6  | 0 | 1.579165  | -1.874819 | -2.116287 |
| 34 | 1  | 0 | 1.500933  | -2.221122 | -3.157219 |
| 35 | 6  | 0 | 3.808988  | -2.627124 | -1.513435 |
| 36 | 1  | 0 | 4.416700  | -2.916585 | -0.652730 |
| 37 | 1  | 0 | 4.181579  | -3.157173 | -2.397989 |
| 38 | 6  | 0 | 1.656061  | 1.557813  | 0.331916  |
| 39 | 6  | 0 | 0.761549  | 0.485380  | 0.413792  |
| 40 | 6  | 0 | 1.108781  | -0.636335 | 1.165933  |
| 41 | 6  | 0 | 2.375762  | -0.742638 | 1.715947  |
| 42 | 6  | 0 | 3.297700  | 0.291539  | 1.614743  |
| 43 | 6  | 0 | 2.911572  | 1.442430  | 0.943837  |
| 44 | 1  | 0 | 0.384981  | -1.437339 | 1.297060  |
| 45 | 1  | 0 | 4.290881  | 0.204381  | 2.037078  |
| 46 | 35 | 0 | 2.894821  | -2.363553 | 2.545749  |
| 47 | 35 | 0 | 4.142788  | 2.862701  | 0.782791  |
| 48 | 8  | 0 | 1.367728  | 2.663778  | -0.416165 |
| 49 | 6  | 0 | 0.879164  | 3.800313  | 0.331780  |
| 50 | 1  | 0 | 1.578645  | 4.019273  | 1.146190  |



|    |    |   |           |          |           |
|----|----|---|-----------|----------|-----------|
| 51 | 1  | 0 | 0.904680  | 4.621757 | -0.387048 |
| 52 | 6  | 0 | -1.514698 | 3.700115 | -0.047916 |
| 53 | 1  | 0 | -1.297246 | 4.120146 | -1.028860 |
| 54 | 6  | 0 | -2.918262 | 3.247485 | 0.164569  |
| 55 | 1  | 0 | -3.636907 | 4.061725 | 0.263281  |
| 56 | 1  | 0 | -2.997262 | 2.525189 | 0.974321  |
| 57 | 35 | 0 | -3.495053 | 2.273268 | -1.441231 |
| 58 | 6  | 0 | -0.520255 | 3.541273 | 0.830877  |
| 59 | 6  | 0 | -0.698806 | 2.988124 | 2.223197  |
| 60 | 1  | 0 | -1.473163 | 3.533076 | 2.770995  |
| 61 | 1  | 0 | -0.993021 | 1.933547 | 2.165777  |
| 62 | 1  | 0 | 0.229802  | 3.064616 | 2.794998  |
| 63 | 6  | 0 | -0.630706 | 0.526994 | -0.243304 |
| 64 | 8  | 0 | -1.606836 | 0.561321 | 0.582654  |
| 65 | 1  | 0 | -0.635766 | 1.217236 | -1.109627 |

**Re-TS1**

| Center<br>Number | Atomic<br>Number | Atomic<br>Type | Coordinates (Angstroms) |           |           |
|------------------|------------------|----------------|-------------------------|-----------|-----------|
|                  |                  |                | X                       | Y         | Z         |
| 1                | 6                | 0              | -5.015817               | -0.028057 | -1.392641 |
| 2                | 6                | 0              | -3.922709               | -0.428852 | -2.159791 |
| 3                | 6                | 0              | -2.777911               | 0.364008  | -2.247251 |
| 4                | 6                | 0              | -2.756153               | 1.556701  | -1.534766 |
| 5                | 6                | 0              | -3.865301               | 1.985985  | -0.790100 |
| 6                | 6                | 0              | -4.997865               | 1.186262  | -0.707766 |
| 7                | 1                | 0              | -5.883175               | -0.676099 | -1.317535 |
| 8                | 1                | 0              | -3.936734               | -1.392291 | -2.657935 |
| 9                | 1                | 0              | -1.902079               | 0.011613  | -2.791155 |
| 10               | 1                | 0              | -5.853378               | 1.502788  | -0.118529 |
| 11               | 6                | 0              | 3.509840                | 0.493193  | -1.554151 |
| 12               | 6                | 0              | 4.650497                | -0.212626 | -1.199813 |
| 13               | 6                | 0              | 5.257979                | 0.022627  | 0.026278  |
| 14               | 6                | 0              | 4.704626                | 0.930703  | 0.918184  |
| 15               | 6                | 0              | 3.526832                | 1.584412  | 0.586459  |
| 16               | 6                | 0              | 2.931190                | 1.385849  | -0.656500 |
| 17               | 9                | 0              | 2.950349                | 2.375055  | 1.480962  |
| 18               | 9                | 0              | 5.264785                | 1.122004  | 2.105144  |
| 19               | 9                | 0              | 6.347283                | -0.651710 | 0.360173  |

|    |    |   |           |           |           |
|----|----|---|-----------|-----------|-----------|
| 20 | 9  | 0 | 5.160391  | -1.119078 | -2.027898 |
| 21 | 9  | 0 | 2.940556  | 0.264705  | -2.727417 |
| 22 | 6  | 0 | -2.134540 | 3.489408  | -0.280950 |
| 23 | 1  | 0 | -1.701179 | 2.970305  | 0.589843  |
| 24 | 8  | 0 | -1.650746 | 4.814669  | -0.352799 |
| 25 | 6  | 0 | -0.350176 | 4.948907  | -0.919165 |
| 26 | 1  | 0 | -0.443739 | 5.386541  | -1.921779 |
| 27 | 1  | 0 | 0.241850  | 5.627739  | -0.301569 |
| 28 | 6  | 0 | 0.382689  | 3.643571  | -1.026682 |
| 29 | 7  | 0 | -0.289876 | 2.490411  | -1.387390 |
| 30 | 7  | 0 | 1.628274  | 3.400082  | -0.769820 |
| 31 | 7  | 0 | 1.715792  | 2.042210  | -0.964451 |
| 32 | 6  | 0 | 0.554889  | 1.445960  | -1.305023 |
| 33 | 6  | 0 | -1.744119 | 2.672125  | -1.525361 |
| 34 | 1  | 0 | -1.881231 | 3.295902  | -2.420666 |
| 35 | 6  | 0 | -3.651723 | 3.369092  | -0.206269 |
| 36 | 1  | 0 | -4.030365 | 3.480603  | 0.812025  |
| 37 | 1  | 0 | -4.115035 | 4.139373  | -0.834836 |
| 38 | 6  | 0 | -1.640929 | -1.635530 | -0.358092 |
| 39 | 6  | 0 | -0.626772 | -0.671888 | -0.272794 |
| 40 | 6  | 0 | -0.572651 | 0.145731  | 0.860326  |
| 41 | 6  | 0 | -1.586567 | 0.135872  | 1.799332  |
| 42 | 6  | 0 | -2.651142 | -0.749453 | 1.691561  |
| 43 | 6  | 0 | -2.636686 | -1.644317 | 0.636412  |
| 44 | 1  | 0 | 0.247230  | 0.847991  | 0.986962  |
| 45 | 1  | 0 | -3.458944 | -0.755682 | 2.412328  |
| 46 | 35 | 0 | -1.564830 | 1.413865  | 3.196868  |
| 47 | 35 | 0 | -4.031256 | -2.904099 | 0.496027  |
| 48 | 8  | 0 | -1.815032 | -2.529998 | -1.360201 |
| 49 | 6  | 0 | -0.736809 | -3.361778 | -1.824175 |
| 50 | 1  | 0 | -1.224947 | -4.316817 | -2.050947 |
| 51 | 1  | 0 | -0.317979 | -2.920826 | -2.726959 |
| 52 | 6  | 0 | 1.583245  | -3.190105 | -1.037163 |
| 53 | 1  | 0 | 1.804539  | -2.701270 | -1.984235 |
| 54 | 6  | 0 | 2.684465  | -3.298724 | -0.044349 |
| 55 | 1  | 0 | 3.675708  | -3.214684 | -0.485390 |
| 56 | 1  | 0 | 2.622755  | -4.183215 | 0.587424  |
| 57 | 35 | 0 | 2.582744  | -1.789548 | 1.253465  |
| 58 | 6  | 0 | 0.324660  | -3.564489 | -0.778104 |
| 59 | 6  | 0 | -0.115542 | -4.141954 | 0.544129  |
| 60 | 1  | 0 | 0.268729  | -3.538914 | 1.373712  |

|    |   |   |           |           |           |
|----|---|---|-----------|-----------|-----------|
| 61 | 1 | 0 | -1.206697 | -4.166382 | 0.613565  |
| 62 | 1 | 0 | 0.251801  | -5.166927 | 0.669560  |
| 63 | 6 | 0 | 0.384554  | -0.444031 | -1.415738 |
| 64 | 8 | 0 | 0.126386  | -0.812320 | -2.584353 |
| 65 | 1 | 0 | 1.403016  | -0.595481 | -1.000934 |

---

***Si-Int1***

| Center<br>Number | Atomic<br>Number | Atomic<br>Type | Coordinates (Angstroms) |           |           |
|------------------|------------------|----------------|-------------------------|-----------|-----------|
|                  |                  |                | X                       | Y         | Z         |
| 1                | 6                | 0              | 4.725180                | 0.853585  | -2.042373 |
| 2                | 6                | 0              | 3.483004                | 1.378481  | -2.402109 |
| 3                | 6                | 0              | 2.349685                | 0.570694  | -2.405799 |
| 4                | 6                | 0              | 2.482050                | -0.756626 | -2.018170 |
| 5                | 6                | 0              | 3.731237                | -1.301759 | -1.695535 |
| 6                | 6                | 0              | 4.859685                | -0.488895 | -1.696449 |
| 7                | 1                | 0              | 5.593918                | 1.503330  | -2.023340 |
| 8                | 1                | 0              | 3.388668                | 2.431110  | -2.644010 |
| 9                | 1                | 0              | 1.379695                | 0.991542  | -2.656065 |
| 10               | 1                | 0              | 5.830723                | -0.896682 | -1.432332 |
| 11               | 6                | 0              | -4.042202               | -0.933838 | -0.724873 |
| 12               | 6                | 0              | -5.223014               | -0.520294 | -0.122056 |
| 13               | 6                | 0              | -5.342870               | -0.598033 | 1.256593  |
| 14               | 6                | 0              | -4.288737               | -1.071842 | 2.036880  |
| 15               | 6                | 0              | -3.112075               | -1.463271 | 1.428599  |
| 16               | 6                | 0              | -2.985493               | -1.373369 | 0.048811  |
| 17               | 9                | 0              | -2.087668               | -1.884982 | 2.156696  |
| 18               | 9                | 0              | -4.424437               | -1.133688 | 3.358282  |
| 19               | 9                | 0              | -6.472094               | -0.221958 | 1.845025  |
| 20               | 9                | 0              | -6.230824               | -0.070677 | -0.859540 |
| 21               | 9                | 0              | -3.915706               | -0.869918 | -2.046317 |
| 22               | 6                | 0              | 2.159374                | -3.012349 | -1.270395 |
| 23               | 1                | 0              | 1.921265                | -2.844893 | -0.209483 |
| 24               | 8                | 0              | 1.674402                | -4.275120 | -1.680939 |
| 25               | 6                | 0              | 0.289690                | -4.299427 | -2.022233 |
| 26               | 1                | 0              | 0.191462                | -4.345547 | -3.114775 |
| 27               | 1                | 0              | -0.165054               | -5.197068 | -1.598600 |
| 28               | 6                | 0              | -0.465143               | -3.104738 | -1.512598 |
| 29               | 7                | 0              | 0.109658                | -1.850643 | -1.545333 |

|    |    |   |           |           |           |
|----|----|---|-----------|-----------|-----------|
| 30 | 7  | 0 | -1.628290 | -3.072361 | -0.942278 |
| 31 | 7  | 0 | -1.771007 | -1.764926 | -0.582141 |
| 32 | 6  | 0 | -0.713054 | -0.999995 | -0.896539 |
| 33 | 6  | 0 | 1.489142  | -1.880325 | -2.069944 |
| 34 | 1  | 0 | 1.379539  | -2.201233 | -3.115690 |
| 35 | 6  | 0 | 3.658266  | -2.799276 | -1.462089 |
| 36 | 1  | 0 | 4.230476  | -3.130680 | -0.592190 |
| 37 | 1  | 0 | 4.007325  | -3.351563 | -2.342387 |
| 38 | 6  | 0 | 1.704864  | 1.536902  | 0.311341  |
| 39 | 6  | 0 | 0.814750  | 0.462391  | 0.414185  |
| 40 | 6  | 0 | 1.169216  | -0.642882 | 1.187043  |
| 41 | 6  | 0 | 2.439238  | -0.738566 | 1.731335  |
| 42 | 6  | 0 | 3.354191  | 0.299682  | 1.616137  |
| 43 | 6  | 0 | 2.959316  | 1.438052  | 0.928257  |
| 44 | 1  | 0 | 0.452296  | -1.447143 | 1.333824  |
| 45 | 1  | 0 | 4.350649  | 0.222824  | 2.032596  |
| 46 | 35 | 0 | 2.973435  | -2.359117 | 2.553053  |
| 47 | 35 | 0 | 4.190844  | 2.852810  | 0.724389  |
| 48 | 8  | 0 | 1.430256  | 2.611232  | -0.486184 |
| 49 | 6  | 0 | 0.931882  | 3.785437  | 0.193981  |
| 50 | 1  | 0 | 1.609838  | 4.035648  | 1.017534  |
| 51 | 1  | 0 | 0.989914  | 4.570928  | -0.562474 |
| 52 | 6  | 0 | -1.446240 | 3.653544  | -0.263999 |
| 53 | 1  | 0 | -1.191457 | 3.992166  | -1.267405 |
| 54 | 6  | 0 | -2.856706 | 3.215863  | -0.064463 |
| 55 | 1  | 0 | -3.579073 | 4.032786  | -0.049752 |
| 56 | 1  | 0 | -2.955827 | 2.549687  | 0.789362  |
| 57 | 35 | 0 | -3.388177 | 2.119621  | -1.608255 |
| 58 | 6  | 0 | -0.485463 | 3.567594  | 0.661392  |
| 59 | 6  | 0 | -0.711117 | 3.121030  | 2.083411  |
| 60 | 1  | 0 | -1.559148 | 3.642937  | 2.535660  |
| 61 | 1  | 0 | -0.926534 | 2.045476  | 2.090068  |
| 62 | 1  | 0 | 0.169789  | 3.319891  | 2.699635  |
| 63 | 6  | 0 | -0.576697 | 0.466276  | -0.257659 |
| 64 | 8  | 0 | -1.560930 | 0.628667  | 0.591990  |
| 65 | 1  | 0 | -0.539591 | 1.154512  | -1.133805 |

---

**Re-Int1**

---

| Center | Atomic | Atomic | Coordinates (Angstroms) |  |  |
|--------|--------|--------|-------------------------|--|--|
|--------|--------|--------|-------------------------|--|--|

| Number | Number | Type | X         | Y         | Z         |
|--------|--------|------|-----------|-----------|-----------|
| 1      | 6      | 0    | -5.127660 | -0.034007 | -1.290844 |
| 2      | 6      | 0    | -4.057083 | -0.495736 | -2.056576 |
| 3      | 6      | 0    | -2.890633 | 0.257154  | -2.186105 |
| 4      | 6      | 0    | -2.823362 | 1.469159  | -1.510270 |
| 5      | 6      | 0    | -3.913158 | 1.968776  | -0.783064 |
| 6      | 6      | 0    | -5.069421 | 1.208200  | -0.660312 |
| 7      | 1      | 0    | -6.013629 | -0.651633 | -1.181949 |
| 8      | 1      | 0    | -4.106966 | -1.475593 | -2.519419 |
| 9      | 1      | 0    | -2.017132 | -0.118594 | -2.719530 |
| 10     | 1      | 0    | -5.911488 | 1.576591  | -0.082075 |
| 11     | 6      | 0    | 3.569802  | 0.446294  | -1.455202 |
| 12     | 6      | 0    | 4.737287  | -0.190308 | -1.061913 |
| 13     | 6      | 0    | 5.310788  | 0.109163  | 0.167123  |
| 14     | 6      | 0    | 4.706942  | 1.023797  | 1.019664  |
| 15     | 6      | 0    | 3.511342  | 1.618909  | 0.644697  |
| 16     | 6      | 0    | 2.946883  | 1.348433  | -0.598031 |
| 17     | 9      | 0    | 2.890537  | 2.431993  | 1.487350  |
| 18     | 9      | 0    | 5.242549  | 1.282722  | 2.204606  |
| 19     | 9      | 0    | 6.421766  | -0.505019 | 0.539207  |
| 20     | 9      | 0    | 5.295458  | -1.108125 | -1.846096 |
| 21     | 9      | 0    | 3.022221  | 0.150109  | -2.622316 |
| 22     | 6      | 0    | -2.141650 | 3.455837  | -0.369145 |
| 23     | 1      | 0    | -1.717751 | 2.984871  | 0.533301  |
| 24     | 8      | 0    | -1.623233 | 4.763286  | -0.524927 |
| 25     | 6      | 0    | -0.373669 | 4.841051  | -1.201569 |
| 26     | 1      | 0    | -0.540608 | 5.144005  | -2.243887 |
| 27     | 1      | 0    | 0.244161  | 5.599009  | -0.716598 |
| 28     | 6      | 0    | 0.371292  | 3.538997  | -1.187527 |
| 29     | 7      | 0    | -0.311616 | 2.358543  | -1.397974 |
| 30     | 7      | 0    | 1.624144  | 3.331903  | -0.926877 |
| 31     | 7      | 0    | 1.722924  | 1.965794  | -0.952191 |
| 32     | 6      | 0    | 0.552067  | 1.351429  | -1.196012 |
| 33     | 6      | 0    | -1.771869 | 2.546653  | -1.556350 |
| 34     | 1      | 0    | -1.875422 | 3.107674  | -2.495536 |
| 35     | 6      | 0    | -3.660702 | 3.375940  | -0.278568 |
| 36     | 1      | 0    | -4.027109 | 3.554849  | 0.734529  |
| 37     | 1      | 0    | -4.111023 | 4.120047  | -0.946715 |
| 38     | 6      | 0    | -1.606955 | -1.592191 | -0.334765 |
| 39     | 6      | 0    | -0.660803 | -0.564529 | -0.198889 |

|    |    |   |           |           |           |
|----|----|---|-----------|-----------|-----------|
| 40 | 6  | 0 | -0.689409 | 0.222674  | 0.955985  |
| 41 | 6  | 0 | -1.708612 | 0.111178  | 1.884215  |
| 42 | 6  | 0 | -2.693087 | -0.854672 | 1.740987  |
| 43 | 6  | 0 | -2.600927 | -1.708878 | 0.654449  |
| 44 | 1  | 0 | 0.069128  | 0.987122  | 1.113344  |
| 45 | 1  | 0 | -3.506351 | -0.947499 | 2.449238  |
| 46 | 35 | 0 | -1.806301 | 1.363184  | 3.301526  |
| 47 | 35 | 0 | -3.914726 | -3.045490 | 0.448580  |
| 48 | 8  | 0 | -1.748576 | -2.436631 | -1.383487 |
| 49 | 6  | 0 | -0.628208 | -3.101325 | -1.991115 |
| 50 | 1  | 0 | -1.063426 | -4.031747 | -2.373995 |
| 51 | 1  | 0 | -0.246643 | -2.475937 | -2.797500 |
| 52 | 6  | 0 | 1.690006  | -2.953490 | -1.216712 |
| 53 | 1  | 0 | 1.870458  | -2.338257 | -2.097372 |
| 54 | 6  | 0 | 2.809930  | -3.140648 | -0.257752 |
| 55 | 1  | 0 | 3.790680  | -2.954060 | -0.691375 |
| 56 | 1  | 0 | 2.797647  | -4.101037 | 0.254729  |
| 57 | 35 | 0 | 2.652808  | -1.817444 | 1.227877  |
| 58 | 6  | 0 | 0.451308  | -3.405941 | -0.990311 |
| 59 | 6  | 0 | 0.051385  | -4.170902 | 0.246011  |
| 60 | 1  | 0 | 0.468316  | -3.702040 | 1.142989  |
| 61 | 1  | 0 | -1.037246 | -4.198631 | 0.346759  |
| 62 | 1  | 0 | 0.410254  | -5.205750 | 0.202842  |
| 63 | 6  | 0 | 0.354562  | -0.169461 | -1.309944 |
| 64 | 8  | 0 | 0.072800  | -0.420001 | -2.575824 |
| 65 | 1  | 0 | 1.324575  | -0.563533 | -0.925677 |

---

**Re-TS6'**

---

| Center<br>Number | Atomic<br>Number | Atomic<br>Type | Coordinates (Angstroms) |          |           |
|------------------|------------------|----------------|-------------------------|----------|-----------|
|                  |                  |                | X                       | Y        | Z         |
| 1                | 6                | 0              | -6.742229               | 1.866649 | -2.942295 |
| 2                | 6                | 0              | -5.756059               | 2.576421 | -2.256600 |
| 3                | 6                | 0              | -5.163850               | 2.039202 | -1.113224 |
| 4                | 6                | 0              | -5.554707               | 0.772987 | -0.696557 |
| 5                | 6                | 0              | -6.580806               | 0.075314 | -1.353812 |
| 6                | 6                | 0              | -7.172501               | 0.619176 | -2.487025 |
| 7                | 1                | 0              | -7.191455               | 2.296879 | -3.831365 |
| 8                | 1                | 0              | -5.453696               | 3.556910 | -2.608669 |

|    |    |   |           |           |           |
|----|----|---|-----------|-----------|-----------|
| 9  | 1  | 0 | -4.426639 | 2.602665  | -0.549312 |
| 10 | 1  | 0 | -7.960182 | 0.084466  | -3.008879 |
| 11 | 6  | 0 | -0.090555 | 1.553721  | 2.089227  |
| 12 | 6  | 0 | 1.241514  | 1.871206  | 2.304609  |
| 13 | 6  | 0 | 2.183369  | 0.861615  | 2.426081  |
| 14 | 6  | 0 | 1.781534  | -0.463585 | 2.337552  |
| 15 | 6  | 0 | 0.453693  | -0.775401 | 2.087756  |
| 16 | 6  | 0 | -0.504507 | 0.230513  | 1.959283  |
| 17 | 9  | 0 | 0.142761  | -2.055315 | 1.900833  |
| 18 | 9  | 0 | 2.687798  | -1.439708 | 2.384644  |
| 19 | 9  | 0 | 3.467962  | 1.162915  | 2.579430  |
| 20 | 9  | 0 | 1.612474  | 3.147738  | 2.371379  |
| 21 | 9  | 0 | -0.968781 | 2.548417  | 2.006220  |
| 22 | 6  | 0 | -5.660464 | -1.429442 | 0.192094  |
| 23 | 1  | 0 | -4.890424 | -1.902383 | -0.443291 |
| 24 | 8  | 0 | -5.807573 | -2.161199 | 1.387948  |
| 25 | 6  | 0 | -4.544830 | -2.392811 | 1.994856  |
| 26 | 1  | 0 | -4.717902 | -2.611878 | 3.049280  |
| 27 | 1  | 0 | -4.058084 | -3.260845 | 1.528428  |
| 28 | 6  | 0 | -3.580034 | -1.237133 | 1.841129  |
| 29 | 7  | 0 | -3.801953 | -0.171693 | 0.990529  |
| 30 | 7  | 0 | -2.381316 | -1.189166 | 2.320581  |
| 31 | 7  | 0 | -1.851778 | -0.074456 | 1.706388  |
| 32 | 6  | 0 | -2.676263 | 0.591155  | 0.849209  |
| 33 | 6  | 0 | -5.177256 | -0.013389 | 0.526568  |
| 34 | 1  | 0 | -5.764681 | 0.350394  | 1.380932  |
| 35 | 6  | 0 | -6.928992 | -1.210436 | -0.624206 |
| 36 | 1  | 0 | -7.167287 | -2.045007 | -1.285438 |
| 37 | 1  | 0 | -7.778897 | -1.049468 | 0.050402  |
| 38 | 6  | 0 | 3.668733  | 0.903829  | -0.674691 |
| 39 | 6  | 0 | 2.664532  | -0.071693 | -0.640366 |
| 40 | 6  | 0 | 3.037650  | -1.413998 | -0.786612 |
| 41 | 6  | 0 | 4.372064  | -1.766596 | -0.996588 |
| 42 | 6  | 0 | 5.334678  | -0.774491 | -1.052097 |
| 43 | 6  | 0 | 4.998539  | 0.567368  | -0.880845 |
| 44 | 1  | 0 | 5.761518  | 1.336324  | -0.898665 |
| 45 | 35 | 0 | 7.147109  | -1.234239 | -1.336284 |
| 46 | 35 | 0 | 3.184610  | 2.695217  | -0.370838 |
| 47 | 8  | 0 | 1.380133  | 0.277444  | -0.380478 |
| 48 | 6  | 0 | 0.529368  | 0.572292  | -1.530757 |
| 49 | 1  | 0 | 1.149510  | 1.112257  | -2.259830 |

|    |    |   |           |           |           |
|----|----|---|-----------|-----------|-----------|
| 50 | 1  | 0 | 0.230347  | -0.385777 | -1.969955 |
| 51 | 6  | 0 | -1.912996 | 0.977096  | -1.013846 |
| 52 | 6  | 0 | -2.378434 | -0.313258 | -1.666091 |
| 53 | 1  | 0 | -3.463662 | -0.399943 | -1.645703 |
| 54 | 1  | 0 | -2.034649 | -0.374497 | -2.696940 |
| 55 | 35 | 0 | -1.733117 | -1.976200 | -0.832625 |
| 56 | 6  | 0 | -0.623872 | 1.425839  | -1.132747 |
| 57 | 6  | 0 | -0.321107 | 2.884812  | -0.906159 |
| 58 | 1  | 0 | 0.291005  | 3.067106  | -0.016016 |
| 59 | 1  | 0 | 0.242638  | 3.300617  | -1.751243 |
| 60 | 1  | 0 | -1.243971 | 3.460989  | -0.793006 |
| 61 | 6  | 0 | 2.015495  | -2.485640 | -0.664774 |
| 62 | 1  | 0 | 0.987189  | -2.146721 | -0.462056 |
| 63 | 8  | 0 | 2.286682  | -3.662183 | -0.773715 |
| 64 | 1  | 0 | 4.627108  | -2.815413 | -1.101335 |
| 65 | 1  | 0 | -2.667645 | 1.746480  | -1.105707 |

---

**Si-TS6'**

---

| Center<br>Number | Atomic<br>Number | Atomic<br>Type | Coordinates (Angstroms) |           |           |
|------------------|------------------|----------------|-------------------------|-----------|-----------|
|                  |                  |                | X                       | Y         | Z         |
| 1                | 6                | 0              | -0.514625               | 5.770534  | -2.595099 |
| 2                | 6                | 0              | -1.000354               | 4.487521  | -2.843318 |
| 3                | 6                | 0              | -1.163469               | 3.575590  | -1.797092 |
| 4                | 6                | 0              | -0.832647               | 3.984124  | -0.515024 |
| 5                | 6                | 0              | -0.360529               | 5.281507  | -0.252491 |
| 6                | 6                | 0              | -0.195447               | 6.179538  | -1.297081 |
| 7                | 1                | 0              | -0.395197               | 6.466046  | -3.419352 |
| 8                | 1                | 0              | -1.258663               | 4.196259  | -3.855954 |
| 9                | 1                | 0              | -1.555415               | 2.577701  | -1.973036 |
| 10               | 1                | 0              | 0.161099                | 7.187861  | -1.110030 |
| 11               | 6                | 0              | -3.209280               | -1.882329 | 1.582726  |
| 12               | 6                | 0              | -3.766510               | -3.108256 | 1.255489  |
| 13               | 6                | 0              | -4.729061               | -3.176279 | 0.256337  |
| 14               | 6                | 0              | -5.129526               | -2.026803 | -0.411198 |
| 15               | 6                | 0              | -4.569083               | -0.804456 | -0.072637 |
| 16               | 6                | 0              | -3.611307               | -0.718495 | 0.933161  |
| 17               | 9                | 0              | -4.941446               | 0.282770  | -0.736199 |
| 18               | 9                | 0              | -6.039436               | -2.104195 | -1.376417 |



|    |    |   |           |           |           |
|----|----|---|-----------|-----------|-----------|
| 19 | 9  | 0 | -5.260643 | -4.347307 | -0.068815 |
| 20 | 9  | 0 | -3.369458 | -4.216187 | 1.872058  |
| 21 | 9  | 0 | -2.242877 | -1.825340 | 2.493713  |
| 22 | 6  | 0 | -1.071543 | 4.396096  | 1.775800  |
| 23 | 1  | 0 | -2.112356 | 4.735600  | 1.643579  |
| 24 | 8  | 0 | -0.886107 | 3.952686  | 3.099089  |
| 25 | 6  | 0 | -1.961374 | 3.098807  | 3.463388  |
| 26 | 1  | 0 | -1.678956 | 2.581750  | 4.381197  |
| 27 | 1  | 0 | -2.866352 | 3.690633  | 3.656298  |
| 28 | 6  | 0 | -2.269036 | 2.083784  | 2.385410  |
| 29 | 7  | 0 | -1.784880 | 2.207450  | 1.096339  |
| 30 | 7  | 0 | -3.015592 | 1.031864  | 2.496033  |
| 31 | 7  | 0 | -2.978512 | 0.505228  | 1.215568  |
| 32 | 6  | 0 | -2.174690 | 1.149850  | 0.325576  |
| 33 | 6  | 0 | -0.831035 | 3.248624  | 0.794427  |
| 34 | 1  | 0 | 0.175799  | 2.839876  | 0.976614  |
| 35 | 6  | 0 | -0.144200 | 5.485809  | 1.240387  |
| 36 | 1  | 0 | -0.403064 | 6.487851  | 1.585357  |
| 37 | 1  | 0 | 0.892235  | 5.271853  | 1.529781  |
| 38 | 6  | 0 | 3.131059  | -1.521933 | -0.649463 |
| 39 | 6  | 0 | 3.232674  | -0.206658 | -1.121568 |
| 40 | 6  | 0 | 4.394967  | 0.520975  | -0.829024 |
| 41 | 6  | 0 | 5.415239  | -0.038158 | -0.056833 |
| 42 | 6  | 0 | 5.278014  | -1.333934 | 0.406999  |
| 43 | 6  | 0 | 4.145599  | -2.089577 | 0.109602  |
| 44 | 1  | 0 | 4.052432  | -3.107677 | 0.468298  |
| 45 | 35 | 0 | 6.649747  | -2.112259 | 1.450803  |
| 46 | 35 | 0 | 1.584043  | -2.523904 | -1.034507 |
| 47 | 8  | 0 | 2.244913  | 0.342980  | -1.875136 |
| 48 | 6  | 0 | 1.341758  | 1.240569  | -1.153588 |
| 49 | 1  | 0 | 1.945639  | 2.061969  | -0.741766 |
| 50 | 1  | 0 | 0.715317  | 1.650739  | -1.947108 |
| 51 | 6  | 0 | -0.677273 | 0.014519  | -0.329301 |
| 52 | 6  | 0 | -1.116931 | -0.338734 | -1.734749 |
| 53 | 1  | 0 | -1.941411 | 0.272711  | -2.095660 |
| 54 | 1  | 0 | -0.284200 | -0.359741 | -2.436355 |
| 55 | 35 | 0 | -1.824884 | -2.174956 | -1.754390 |
| 56 | 6  | 0 | 0.550136  | 0.563241  | -0.080372 |
| 57 | 6  | 0 | 1.132476  | 0.460845  | 1.310255  |
| 58 | 1  | 0 | 1.487072  | -0.558520 | 1.513599  |
| 59 | 1  | 0 | 1.981771  | 1.137841  | 1.448649  |

|    |   |   |           |           |           |
|----|---|---|-----------|-----------|-----------|
| 60 | 1 | 0 | 0.388495  | 0.700802  | 2.082490  |
| 61 | 6 | 0 | 4.587820  | 1.885715  | -1.386670 |
| 62 | 1 | 0 | 3.827535  | 2.220157  | -2.113125 |
| 63 | 8 | 0 | 5.530600  | 2.587209  | -1.091417 |
| 64 | 1 | 0 | 6.300969  | 0.551791  | 0.151061  |
| 65 | 1 | 0 | -1.013028 | -0.691015 | 0.429515  |

---

**Re-Int6'**

---

| Center<br>Number | Atomic<br>Number | Atomic<br>Type | Coordinates (Angstroms) |           |           |
|------------------|------------------|----------------|-------------------------|-----------|-----------|
|                  |                  |                | X                       | Y         | Z         |
| 1                | 6                | 0              | 6.509424                | -0.642994 | 3.651923  |
| 2                | 6                | 0              | 5.677561                | 0.471040  | 3.542921  |
| 3                | 6                | 0              | 5.186295                | 0.849415  | 2.298118  |
| 4                | 6                | 0              | 5.503643                | 0.061474  | 1.200639  |
| 5                | 6                | 0              | 6.384065                | -1.026429 | 1.295573  |
| 6                | 6                | 0              | 6.877186                | -1.382620 | 2.528069  |
| 7                | 1                | 0              | 6.888806                | -0.926123 | 4.628125  |
| 8                | 1                | 0              | 5.435729                | 1.053563  | 4.422314  |
| 9                | 1                | 0              | 4.594194                | 1.760448  | 2.200455  |
| 10               | 1                | 0              | 7.550306                | -2.228954 | 2.631171  |
| 11               | 6                | 0              | 0.051094                | 2.498808  | -1.007803 |
| 12               | 6                | 0              | -1.269320               | 2.862230  | -1.117910 |
| 13               | 6                | 0              | -2.144005               | 2.024073  | -1.796157 |
| 14               | 6                | 0              | -1.703675               | 0.851840  | -2.397132 |
| 15               | 6                | 0              | -0.382847               | 0.482981  | -2.273886 |
| 16               | 6                | 0              | 0.470881                | 1.283870  | -1.544069 |
| 17               | 9                | 0              | 0.038146                | -0.679573 | -2.765872 |
| 18               | 9                | 0              | -2.555226               | 0.037383  | -2.992006 |
| 19               | 9                | 0              | -3.430689               | 2.342495  | -1.852476 |
| 20               | 9                | 0              | -1.688320               | 3.989412  | -0.557681 |
| 21               | 9                | 0              | 0.941780                | 3.287059  | -0.406557 |
| 22               | 6                | 0              | 5.536673                | -1.095329 | -0.899145 |
| 23               | 1                | 0              | 4.661756                | -1.759067 | -0.756876 |
| 24               | 8                | 0              | 5.790738                | -0.935553 | -2.278347 |
| 25               | 6                | 0              | 4.946513                | 0.011019  | -2.924391 |
| 26               | 1                | 0              | 5.539374                | 0.892237  | -3.191865 |
| 27               | 1                | 0              | 4.534324                | -0.415913 | -3.839232 |
| 28               | 6                | 0              | 3.744692                | 0.462151  | -2.078823 |

|    |    |   |           |           |           |
|----|----|---|-----------|-----------|-----------|
| 29 | 7  | 0 | 3.786809  | 0.541350  | -0.691942 |
| 30 | 7  | 0 | 2.546491  | 0.720999  | -2.504149 |
| 31 | 7  | 0 | 1.814797  | 0.909435  | -1.385293 |
| 32 | 6  | 0 | 2.468279  | 0.608699  | -0.219411 |
| 33 | 6  | 0 | 5.173000  | 0.253790  | -0.236001 |
| 34 | 1  | 0 | 5.766072  | 1.068297  | -0.674615 |
| 35 | 6  | 0 | 6.702989  | -1.602039 | -0.074189 |
| 36 | 1  | 0 | 6.783627  | -2.690115 | -0.078961 |
| 37 | 1  | 0 | 7.642376  | -1.182886 | -0.453798 |
| 38 | 6  | 0 | -3.704207 | 0.381223  | 0.952031  |
| 39 | 6  | 0 | -2.673887 | -0.402000 | 0.303132  |
| 40 | 6  | 0 | -3.091350 | -1.724733 | -0.068490 |
| 41 | 6  | 0 | -4.415216 | -2.157857 | 0.064422  |
| 42 | 6  | 0 | -5.346378 | -1.311426 | 0.622564  |
| 43 | 6  | 0 | -4.998749 | -0.025018 | 1.080382  |
| 44 | 1  | 0 | -5.756775 | 0.613139  | 1.516699  |
| 45 | 35 | 0 | -7.146072 | -1.870162 | 0.787323  |
| 46 | 35 | 0 | -3.180000 | 2.128560  | 1.494801  |
| 47 | 8  | 0 | -1.570423 | 0.001812  | 0.074729  |
| 48 | 6  | 0 | -0.154513 | -0.124891 | 1.811146  |
| 49 | 1  | 0 | -1.149000 | 0.106440  | 2.341419  |
| 50 | 1  | 0 | -0.148817 | -1.197008 | 1.395453  |
| 51 | 6  | 0 | 2.222254  | 0.543859  | 0.796378  |
| 52 | 6  | 0 | 2.380167  | -1.059873 | 1.190943  |
| 53 | 1  | 0 | 3.427521  | -1.374299 | 1.313657  |
| 54 | 1  | 0 | 1.754611  | -1.310342 | 2.097911  |
| 55 | 35 | 0 | 1.729432  | -2.053282 | -0.358168 |
| 56 | 6  | 0 | 0.662286  | 0.777264  | 1.600319  |
| 57 | 6  | 0 | 0.392964  | 2.123971  | 2.225180  |
| 58 | 1  | 0 | -0.099645 | 2.882868  | 1.592415  |
| 59 | 1  | 0 | -0.286537 | 1.982966  | 3.077544  |
| 60 | 1  | 0 | 1.295943  | 2.612681  | 2.621776  |
| 61 | 6  | 0 | -2.101376 | -2.576927 | -0.700014 |
| 62 | 1  | 0 | -1.096678 | -2.133242 | -0.775388 |
| 63 | 8  | 0 | -2.322824 | -3.710747 | -1.119781 |
| 64 | 1  | 0 | -4.687281 | -3.144226 | -0.282277 |
| 65 | 1  | 0 | 2.838007  | 0.879484  | 1.745917  |

---

***Si-Int6'***

---

| Center<br>Number | Atomic<br>Number | Atomic<br>Type | Coordinates (Angstroms) |           |           |
|------------------|------------------|----------------|-------------------------|-----------|-----------|
|                  |                  |                | X                       | Y         | Z         |
| 1                | 6                | 0              | -1.534138               | 5.837489  | -2.403862 |
| 2                | 6                | 0              | -1.724530               | 4.491678  | -2.710878 |
| 3                | 6                | 0              | -1.718642               | 3.528194  | -1.699310 |
| 4                | 6                | 0              | -1.522362               | 3.950136  | -0.391718 |
| 5                | 6                | 0              | -1.377800               | 5.309001  | -0.072155 |
| 6                | 6                | 0              | -1.366211               | 6.251982  | -1.079974 |
| 7                | 1                | 0              | -1.532540               | 6.573958  | -3.200588 |
| 8                | 1                | 0              | -1.875360               | 4.188759  | -3.741494 |
| 9                | 1                | 0              | -1.863632               | 2.493014  | -1.951187 |
| 10               | 1                | 0              | -1.246256               | 7.304752  | -0.843515 |
| 11               | 6                | 0              | -2.112822               | -2.454072 | 1.394232  |
| 12               | 6                | 0              | -2.327154               | -3.769064 | 1.045029  |
| 13               | 6                | 0              | -3.472980               | -4.105506 | 0.322355  |
| 14               | 6                | 0              | -4.395456               | -3.127289 | -0.053930 |
| 15               | 6                | 0              | -4.160537               | -1.801908 | 0.284815  |
| 16               | 6                | 0              | -3.011146               | -1.472676 | 0.989594  |
| 17               | 9                | 0              | -5.001859               | -0.860526 | -0.118577 |
| 18               | 9                | 0              | -5.470402               | -3.471602 | -0.742939 |
| 19               | 9                | 0              | -3.676474               | -5.361227 | -0.010355 |
| 20               | 9                | 0              | -1.462399               | -4.693877 | 1.394757  |
| 21               | 9                | 0              | -1.025070               | -2.090767 | 2.059754  |
| 22               | 6                | 0              | -1.998732               | 4.212206  | 1.864924  |
| 23               | 1                | 0              | -3.062988               | 4.313883  | 1.631672  |
| 24               | 8                | 0              | -1.853291               | 3.774890  | 3.198050  |
| 25               | 6                | 0              | -2.792536               | 2.746622  | 3.407779  |
| 26               | 1                | 0              | -2.538808               | 2.212417  | 4.325833  |
| 27               | 1                | 0              | -3.817072               | 3.138619  | 3.490185  |
| 28               | 6                | 0              | -2.731843               | 1.708621  | 2.282159  |
| 29               | 7                | 0              | -1.971892               | 1.883257  | 1.126664  |
| 30               | 7                | 0              | -3.185316               | 0.489030  | 2.345842  |
| 31               | 7                | 0              | -2.659211               | -0.133925 | 1.256001  |
| 32               | 6                | 0              | -1.669639               | 0.620724  | 0.596762  |
| 33               | 6                | 0              | -1.359454               | 3.204984  | 0.899847  |
| 34               | 1                | 0              | -0.293963               | 3.037503  | 1.082167  |
| 35               | 6                | 0              | -1.294303               | 5.491784  | 1.433061  |
| 36               | 1                | 0              | -1.794751               | 6.400842  | 1.783830  |
| 37               | 1                | 0              | -0.266085               | 5.501344  | 1.787098  |
| 38               | 6                | 0              | 3.119771                | -1.051492 | -0.700616 |

|    |    |   |           |           |           |
|----|----|---|-----------|-----------|-----------|
| 39 | 6  | 0 | 3.189200  | 0.276044  | -1.263656 |
| 40 | 6  | 0 | 4.322122  | 1.032529  | -0.830272 |
| 41 | 6  | 0 | 5.329127  | 0.489648  | -0.021438 |
| 42 | 6  | 0 | 5.214347  | -0.813346 | 0.423564  |
| 43 | 6  | 0 | 4.107378  | -1.591751 | 0.087512  |
| 44 | 1  | 0 | 4.030698  | -2.615981 | 0.452839  |
| 45 | 35 | 0 | 6.578410  | -1.573487 | 1.484208  |
| 46 | 35 | 0 | 1.598065  | -2.103527 | -1.141043 |
| 47 | 8  | 0 | 2.299066  | 0.736667  | -2.005910 |
| 48 | 6  | 0 | 0.988062  | 1.750312  | -0.899776 |
| 49 | 1  | 0 | 1.874959  | 2.405162  | -0.615882 |
| 50 | 1  | 0 | 0.571743  | 2.058396  | -1.893722 |
| 51 | 6  | 0 | -1.106271 | 0.332140  | -0.260849 |
| 52 | 6  | 0 | -1.085556 | -0.033038 | -1.813479 |
| 53 | 1  | 0 | -1.659343 | 0.634067  | -2.509389 |
| 54 | 1  | 0 | 0.010431  | -0.108353 | -2.114327 |
| 55 | 35 | 0 | -1.818516 | -1.832015 | -2.162171 |
| 56 | 6  | 0 | 0.340079  | 1.141037  | 0.007706  |
| 57 | 6  | 0 | 0.973973  | 0.739590  | 1.323680  |
| 58 | 1  | 0 | 1.178633  | -0.351421 | 1.456009  |
| 59 | 1  | 0 | 1.938212  | 1.243382  | 1.434832  |
| 60 | 1  | 0 | 0.376750  | 1.032672  | 2.242807  |
| 61 | 6  | 0 | 4.484502  | 2.393154  | -1.338340 |
| 62 | 1  | 0 | 3.709119  | 2.713123  | -2.051394 |
| 63 | 8  | 0 | 5.393682  | 3.146986  | -1.016110 |
| 64 | 1  | 0 | 6.182430  | 1.101086  | 0.237610  |
| 65 | 1  | 0 | -0.564279 | -0.822477 | -0.026343 |

---

**TS2**

---

| Center<br>Number | Atomic<br>Number | Atomic<br>Type | Coordinates (Angstroms) |           |           |
|------------------|------------------|----------------|-------------------------|-----------|-----------|
|                  |                  |                | X                       | Y         | Z         |
| 1                | 6                | 0              | -4.799770               | 0.314878  | -1.600728 |
| 2                | 6                | 0              | -3.676938               | -0.487113 | -1.820174 |
| 3                | 6                | 0              | -2.398424               | 0.056875  | -1.740262 |
| 4                | 6                | 0              | -2.268116               | 1.397777  | -1.406794 |
| 5                | 6                | 0              | -3.387237               | 2.220793  | -1.243376 |
| 6                | 6                | 0              | -4.662965               | 1.673196  | -1.325167 |
| 7                | 1                | 0              | -5.789554               | -0.127400 | -1.648963 |

|    |    |   |           |           |           |
|----|----|---|-----------|-----------|-----------|
| 8  | 1  | 0 | -3.807140 | -1.548366 | -2.014685 |
| 9  | 1  | 0 | -1.509042 | -0.548632 | -1.883286 |
| 10 | 1  | 0 | -5.538657 | 2.295680  | -1.168839 |
| 11 | 6  | 0 | 4.461154  | 0.740493  | 0.281552  |
| 12 | 6  | 0 | 5.489305  | 0.111557  | 0.965887  |
| 13 | 6  | 0 | 5.240883  | -0.444869 | 2.215746  |
| 14 | 6  | 0 | 3.976586  | -0.366562 | 2.785041  |
| 15 | 6  | 0 | 2.956302  | 0.272989  | 2.098611  |
| 16 | 6  | 0 | 3.195604  | 0.829572  | 0.848050  |
| 17 | 9  | 0 | 1.760992  | 0.405000  | 2.659378  |
| 18 | 9  | 0 | 3.755365  | -0.895981 | 3.983856  |
| 19 | 9  | 0 | 6.224050  | -1.049794 | 2.872441  |
| 20 | 9  | 0 | 6.703258  | 0.023476  | 0.428541  |
| 21 | 9  | 0 | 4.684291  | 1.238309  | -0.931257 |
| 22 | 6  | 0 | -1.527204 | 3.532434  | -0.637888 |
| 23 | 1  | 0 | -1.492884 | 3.320455  | 0.442230  |
| 24 | 8  | 0 | -0.703541 | 4.644104  | -0.933701 |
| 25 | 6  | 0 | 0.635185  | 4.335442  | -1.315527 |
| 26 | 1  | 0 | 0.709353  | 4.311481  | -2.411242 |
| 27 | 1  | 0 | 1.286556  | 5.129259  | -0.947002 |
| 28 | 6  | 0 | 1.117214  | 3.024133  | -0.762590 |
| 29 | 7  | 0 | 0.248494  | 1.955129  | -0.711425 |
| 30 | 7  | 0 | 2.277763  | 2.743488  | -0.273943 |
| 31 | 7  | 0 | 2.145953  | 1.435095  | 0.133333  |
| 32 | 6  | 0 | 0.898991  | 0.926545  | -0.074606 |
| 33 | 6  | 0 | -1.040875 | 2.263256  | -1.352095 |
| 34 | 1  | 0 | -0.779739 | 2.518108  | -2.390011 |
| 35 | 6  | 0 | -2.994181 | 3.671166  | -1.042801 |
| 36 | 1  | 0 | -3.591743 | 4.180171  | -0.283269 |
| 37 | 1  | 0 | -3.071330 | 4.232210  | -1.981860 |
| 38 | 6  | 0 | -1.499796 | -1.865247 | 0.653919  |
| 39 | 6  | 0 | -0.838127 | -0.630126 | 0.799467  |
| 40 | 6  | 0 | -1.528298 | 0.430468  | 1.386990  |
| 41 | 6  | 0 | -2.883324 | 0.328593  | 1.666301  |
| 42 | 6  | 0 | -3.573640 | -0.853683 | 1.459333  |
| 43 | 6  | 0 | -2.854713 | -1.943514 | 0.974012  |
| 44 | 1  | 0 | -1.013253 | 1.365634  | 1.578569  |
| 45 | 1  | 0 | -4.637178 | -0.930051 | 1.646284  |
| 46 | 35 | 0 | -3.806962 | 1.878290  | 2.239065  |
| 47 | 35 | 0 | -3.779701 | -3.543275 | 0.590051  |
| 48 | 8  | 0 | -0.838044 | -2.973395 | 0.217744  |

|    |    |   |           |           |           |
|----|----|---|-----------|-----------|-----------|
| 49 | 6  | 0 | -0.902899 | -3.316137 | -1.171150 |
| 50 | 1  | 0 | -1.140133 | -4.385777 | -1.207987 |
| 51 | 1  | 0 | -1.713359 | -2.771424 | -1.669804 |
| 52 | 6  | 0 | 0.514384  | -2.237107 | -2.887273 |
| 53 | 1  | 0 | -0.386974 | -1.764557 | -3.273584 |
| 54 | 6  | 0 | 1.787524  | -1.880301 | -3.571578 |
| 55 | 1  | 0 | 1.636378  | -1.527994 | -4.589054 |
| 56 | 1  | 0 | 2.524728  | -2.679554 | -3.558652 |
| 57 | 35 | 0 | 2.687363  | -0.369653 | -2.645194 |
| 58 | 6  | 0 | 0.432557  | -3.048445 | -1.823393 |
| 59 | 6  | 0 | 1.612040  | -3.717813 | -1.175238 |
| 60 | 1  | 0 | 2.545461  | -3.203177 | -1.409059 |
| 61 | 1  | 0 | 1.488898  | -3.675950 | -0.091776 |
| 62 | 1  | 0 | 1.677619  | -4.764885 | -1.494730 |
| 63 | 6  | 0 | 0.517809  | -0.418472 | 0.237668  |
| 64 | 8  | 0 | 1.581067  | -1.299459 | 0.571071  |
| 65 | 1  | 0 | 0.910350  | -1.132656 | -0.605443 |

---

### TS3

| Center<br>Number | Atomic<br>Number | Atomic<br>Type | Coordinates (Angstroms) |           |           |
|------------------|------------------|----------------|-------------------------|-----------|-----------|
|                  |                  |                | X                       | Y         | Z         |
| 1                | 6                | 0              | 5.474016                | -0.355059 | 2.092132  |
| 2                | 6                | 0              | 4.287501                | -0.921249 | 1.628819  |
| 3                | 6                | 0              | 3.184738                | -0.121484 | 1.334764  |
| 4                | 6                | 0              | 3.282713                | 1.260846  | 1.463371  |
| 5                | 6                | 0              | 4.454644                | 1.815363  | 2.005001  |
| 6                | 6                | 0              | 5.553469                | 1.018754  | 2.304717  |
| 7                | 1                | 0              | 6.328579                | -0.987931 | 2.308119  |
| 8                | 1                | 0              | 4.212895                | -1.995511 | 1.493234  |
| 9                | 1                | 0              | 2.269569                | -0.585319 | 0.995110  |
| 10               | 1                | 0              | 6.457177                | 1.466843  | 2.706195  |
| 11               | 6                | 0              | -3.025236               | 2.710627  | -0.936154 |
| 12               | 6                | 0              | -4.200642               | 2.210240  | -1.467638 |
| 13               | 6                | 0              | -4.151410               | 1.365684  | -2.568821 |
| 14               | 6                | 0              | -2.937772               | 1.073630  | -3.170226 |
| 15               | 6                | 0              | -1.764312               | 1.577819  | -2.632966 |
| 16               | 6                | 0              | -1.797266               | 2.394972  | -1.509042 |
| 17               | 9                | 0              | -0.605123               | 1.296770  | -3.215869 |

|    |    |   |           |           |           |
|----|----|---|-----------|-----------|-----------|
| 18 | 9  | 0 | -2.893718 | 0.239790  | -4.210589 |
| 19 | 9  | 0 | -5.273789 | 0.834432  | -3.043594 |
| 20 | 9  | 0 | -5.367907 | 2.457528  | -0.869046 |
| 21 | 9  | 0 | -3.080067 | 3.423567  | 0.190209  |
| 22 | 6  | 0 | 3.144586  | 3.630761  | 1.355618  |
| 23 | 1  | 0 | 3.526798  | 3.755968  | 0.328388  |
| 24 | 8  | 0 | 2.418639  | 4.769741  | 1.743634  |
| 25 | 6  | 0 | 1.506591  | 5.111683  | 0.723340  |
| 26 | 1  | 0 | 0.785813  | 5.824658  | 1.124170  |
| 27 | 1  | 0 | 2.037283  | 5.580363  | -0.117894 |
| 28 | 6  | 0 | 0.768691  | 3.909980  | 0.195004  |
| 29 | 7  | 0 | 1.275760  | 2.614836  | 0.235263  |
| 30 | 7  | 0 | -0.358628 | 3.986142  | -0.424996 |
| 31 | 7  | 0 | -0.602945 | 2.697533  | -0.830913 |
| 32 | 6  | 0 | 0.357326  | 1.814227  | -0.427582 |
| 33 | 6  | 0 | 2.246699  | 2.374628  | 1.347543  |
| 34 | 1  | 0 | 1.637545  | 2.363623  | 2.262342  |
| 35 | 6  | 0 | 4.303630  | 3.291887  | 2.271706  |
| 36 | 1  | 0 | 5.198553  | 3.879323  | 2.059662  |
| 37 | 1  | 0 | 4.012480  | 3.467902  | 3.314603  |
| 38 | 6  | 0 | 1.186783  | -1.767080 | -1.456455 |
| 39 | 6  | 0 | 1.308813  | -0.387868 | -1.150013 |
| 40 | 6  | 0 | 2.529516  | 0.229350  | -1.445819 |
| 41 | 6  | 0 | 3.628434  | -0.494983 | -1.870982 |
| 42 | 6  | 0 | 3.554291  | -1.858777 | -2.100942 |
| 43 | 6  | 0 | 2.319236  | -2.462639 | -1.901853 |
| 44 | 1  | 0 | 2.649708  | 1.294699  | -1.287333 |
| 45 | 1  | 0 | 4.414006  | -2.434574 | -2.418237 |
| 46 | 35 | 0 | 5.292962  | 0.395728  | -2.030451 |
| 47 | 35 | 0 | 2.169632  | -4.323074 | -2.230906 |
| 48 | 8  | 0 | 0.027822  | -2.475915 | -1.433556 |
| 49 | 6  | 0 | -0.714144 | -2.605865 | -0.230390 |
| 50 | 1  | 0 | -0.519910 | -3.615606 | 0.161516  |
| 51 | 1  | 0 | -0.391572 | -1.867630 | 0.505773  |
| 52 | 6  | 0 | -3.036280 | -2.479808 | 0.554426  |
| 53 | 1  | 0 | -2.633186 | -2.592603 | 1.560295  |
| 54 | 6  | 0 | -4.507232 | -2.349858 | 0.444286  |
| 55 | 1  | 0 | -5.038205 | -2.715068 | 1.320383  |
| 56 | 1  | 0 | -4.927796 | -2.789495 | -0.456775 |
| 57 | 35 | 0 | -5.079989 | -0.426963 | 0.312775  |
| 58 | 6  | 0 | -2.196184 | -2.419064 | -0.487859 |



|    |   |   |           |           |           |
|----|---|---|-----------|-----------|-----------|
| 59 | 6 | 0 | -2.635042 | -2.189620 | -1.902762 |
| 60 | 1 | 0 | -3.658319 | -1.809175 | -1.947433 |
| 61 | 1 | 0 | -1.964304 | -1.447911 | -2.338415 |
| 62 | 1 | 0 | -2.568554 | -3.111887 | -2.491120 |
| 63 | 6 | 0 | 0.164136  | 0.369020  | -0.522646 |
| 64 | 8 | 0 | -1.054292 | -0.003431 | -0.889913 |
| 65 | 1 | 0 | 0.069654  | 0.250868  | 0.913232  |
| 66 | 6 | 0 | 0.611749  | -1.466772 | 3.156945  |
| 67 | 6 | 0 | -0.722624 | -0.786891 | 2.894620  |
| 68 | 6 | 0 | 0.809519  | -2.043649 | 4.559756  |
| 69 | 6 | 0 | -2.049542 | -2.387794 | 4.340058  |
| 70 | 6 | 0 | 0.236505  | -3.454086 | 4.691246  |
| 71 | 6 | 0 | -1.129756 | -3.559222 | 4.015807  |
| 72 | 1 | 0 | 0.786069  | -2.241683 | 2.397957  |
| 73 | 1 | 0 | -2.013516 | -2.154646 | 5.413262  |
| 74 | 1 | 0 | 0.342450  | -1.373716 | 5.290803  |
| 75 | 1 | 0 | 0.147246  | -3.718629 | 5.750137  |
| 76 | 1 | 0 | 1.351559  | -0.687546 | 2.975496  |
| 77 | 1 | 0 | 1.878850  | -2.051450 | 4.787910  |
| 78 | 1 | 0 | -3.080729 | -2.685739 | 4.118047  |
| 79 | 1 | 0 | 0.920815  | -4.178642 | 4.237322  |
| 80 | 1 | 0 | -1.633466 | -4.476114 | 4.334538  |
| 81 | 1 | 0 | -1.021054 | -3.634535 | 2.926856  |
| 82 | 6 | 0 | -3.069361 | -0.354816 | 3.473913  |
| 83 | 1 | 0 | -3.775049 | -0.853460 | 2.796864  |
| 84 | 1 | 0 | -3.518652 | -0.336837 | 4.472415  |
| 85 | 6 | 0 | -1.901386 | 0.960594  | 1.749000  |
| 86 | 1 | 0 | -1.594519 | 1.963209  | 1.434909  |
| 87 | 1 | 0 | -2.419225 | 0.494303  | 0.902848  |
| 88 | 6 | 0 | -2.788790 | 1.048997  | 2.976765  |
| 89 | 1 | 0 | -3.733588 | 1.536930  | 2.722095  |
| 90 | 1 | 0 | -2.297873 | 1.636353  | 3.759759  |
| 91 | 7 | 0 | -0.687730 | 0.202370  | 2.040417  |
| 92 | 7 | 0 | -1.840783 | -1.154500 | 3.563360  |

---

**Int3**

---

| Center<br>Number | Atomic<br>Number | Atomic<br>Type | Coordinates (Angstroms) |   |   |
|------------------|------------------|----------------|-------------------------|---|---|
|                  |                  |                | X                       | Y | Z |

---

|    |   |   |           |           |           |
|----|---|---|-----------|-----------|-----------|
| 1  | 6 | 0 | 5.281473  | -0.872036 | 2.121447  |
| 2  | 6 | 0 | 4.041518  | -1.265646 | 1.616066  |
| 3  | 6 | 0 | 3.055504  | -0.319950 | 1.347204  |
| 4  | 6 | 0 | 3.323534  | 1.031271  | 1.548045  |
| 5  | 6 | 0 | 4.541204  | 1.411890  | 2.131461  |
| 6  | 6 | 0 | 5.527147  | 0.469235  | 2.403451  |
| 7  | 1 | 0 | 6.047819  | -1.615784 | 2.314387  |
| 8  | 1 | 0 | 3.840141  | -2.314397 | 1.421182  |
| 9  | 1 | 0 | 2.102165  | -0.640253 | 0.943160  |
| 10 | 1 | 0 | 6.473335  | 0.779382  | 2.836800  |
| 11 | 6 | 0 | -3.035999 | 2.945362  | -0.207869 |
| 12 | 6 | 0 | -4.255224 | 2.596614  | -0.760204 |
| 13 | 6 | 0 | -4.306894 | 2.013260  | -2.020889 |
| 14 | 6 | 0 | -3.131104 | 1.778567  | -2.711036 |
| 15 | 6 | 0 | -1.912392 | 2.120698  | -2.146141 |
| 16 | 6 | 0 | -1.830822 | 2.681234  | -0.867797 |
| 17 | 9 | 0 | -0.809963 | 1.960514  | -2.874613 |
| 18 | 9 | 0 | -3.169885 | 1.218466  | -3.923287 |
| 19 | 9 | 0 | -5.480531 | 1.657277  | -2.542829 |
| 20 | 9 | 0 | -5.380337 | 2.733453  | -0.049638 |
| 21 | 9 | 0 | -3.018704 | 3.433249  | 1.039415  |
| 22 | 6 | 0 | 3.434686  | 3.408848  | 1.601881  |
| 23 | 1 | 0 | 3.827139  | 3.596524  | 0.588067  |
| 24 | 8 | 0 | 2.814183  | 4.567875  | 2.103163  |
| 25 | 6 | 0 | 1.829373  | 5.021156  | 1.190697  |
| 26 | 1 | 0 | 1.181063  | 5.726786  | 1.710837  |
| 27 | 1 | 0 | 2.311838  | 5.536302  | 0.346725  |
| 28 | 6 | 0 | 0.991898  | 3.899969  | 0.635872  |
| 29 | 7 | 0 | 1.549085  | 2.649565  | 0.340259  |
| 30 | 7 | 0 | -0.246294 | 4.030402  | 0.331336  |
| 31 | 7 | 0 | -0.605053 | 2.819100  | -0.234824 |
| 32 | 6 | 0 | 0.479751  | 1.896217  | -0.241855 |
| 33 | 6 | 0 | 2.421782  | 2.253971  | 1.472108  |
| 34 | 1 | 0 | 1.795754  | 2.240705  | 2.382977  |
| 35 | 6 | 0 | 4.552709  | 2.880307  | 2.483969  |
| 36 | 1 | 0 | 5.508986  | 3.376806  | 2.308750  |
| 37 | 1 | 0 | 4.281300  | 3.019757  | 3.538091  |
| 38 | 6 | 0 | 1.345436  | -1.453411 | -1.807526 |
| 39 | 6 | 0 | 1.471103  | -0.124090 | -1.324041 |
| 40 | 6 | 0 | 2.741904  | 0.469562  | -1.402344 |
| 41 | 6 | 0 | 3.858127  | -0.260742 | -1.751388 |

|    |    |   |           |           |           |
|----|----|---|-----------|-----------|-----------|
| 42 | 6  | 0 | 3.774330  | -1.592801 | -2.136576 |
| 43 | 6  | 0 | 2.502127  | -2.149843 | -2.176985 |
| 44 | 1  | 0 | 2.863676  | 1.505047  | -1.108013 |
| 45 | 1  | 0 | 4.651121  | -2.173925 | -2.390414 |
| 46 | 35 | 0 | 5.559349  | 0.549164  | -1.541984 |
| 47 | 35 | 0 | 2.327151  | -3.955099 | -2.730797 |
| 48 | 8  | 0 | 0.152746  | -2.080025 | -2.025070 |
| 49 | 6  | 0 | -0.621784 | -2.481733 | -0.905302 |
| 50 | 1  | 0 | -0.427892 | -3.550573 | -0.731517 |
| 51 | 1  | 0 | -0.326336 | -1.915175 | -0.019511 |
| 52 | 6  | 0 | -2.979917 | -2.560495 | -0.196069 |
| 53 | 1  | 0 | -2.623422 | -2.916337 | 0.770911  |
| 54 | 6  | 0 | -4.451238 | -2.476622 | -0.363493 |
| 55 | 1  | 0 | -4.998391 | -3.054144 | 0.378096  |
| 56 | 1  | 0 | -4.793487 | -2.733720 | -1.362849 |
| 57 | 35 | 0 | -5.161043 | -0.609413 | -0.127245 |
| 58 | 6  | 0 | -2.099435 | -2.252069 | -1.159848 |
| 59 | 6  | 0 | -2.501553 | -1.696097 | -2.493241 |
| 60 | 1  | 0 | -3.518401 | -1.298210 | -2.468031 |
| 61 | 1  | 0 | -1.814690 | -0.883640 | -2.732695 |
| 62 | 1  | 0 | -2.430312 | -2.458296 | -3.277627 |
| 63 | 6  | 0 | 0.318955  | 0.621080  | -0.771501 |
| 64 | 8  | 0 | -0.883376 | 0.156283  | -0.912892 |
| 65 | 1  | 0 | -0.255074 | -0.074607 | 1.389665  |
| 66 | 6  | 0 | 0.276065  | -2.046119 | 2.874766  |
| 67 | 6  | 0 | -1.076517 | -1.390216 | 2.698595  |
| 68 | 6  | 0 | 0.520037  | -2.683235 | 4.245213  |
| 69 | 6  | 0 | -2.349529 | -3.078941 | 4.048023  |
| 70 | 6  | 0 | -0.028504 | -4.107126 | 4.325805  |
| 71 | 6  | 0 | -1.406463 | -4.216407 | 3.674802  |
| 72 | 1  | 0 | 0.426741  | -2.781774 | 2.074526  |
| 73 | 1  | 0 | -2.296312 | -2.855447 | 5.120742  |
| 74 | 1  | 0 | 0.070203  | -2.051021 | 5.018754  |
| 75 | 1  | 0 | -0.086752 | -4.416109 | 5.374111  |
| 76 | 1  | 0 | 1.006934  | -1.251074 | 2.710455  |
| 77 | 1  | 0 | 1.595990  | -2.683968 | 4.436253  |
| 78 | 1  | 0 | -3.374736 | -3.392904 | 3.836004  |
| 79 | 1  | 0 | 0.658585  | -4.797734 | 3.826438  |
| 80 | 1  | 0 | -1.885541 | -5.151062 | 3.978756  |
| 81 | 1  | 0 | -1.322343 | -4.262467 | 2.582453  |
| 82 | 6  | 0 | -3.458180 | -1.079303 | 3.152014  |

|    |   |   |           |           |          |
|----|---|---|-----------|-----------|----------|
| 83 | 1 | 0 | -4.059700 | -1.569270 | 2.377242 |
| 84 | 1 | 0 | -3.985066 | -1.176357 | 4.104665 |
| 85 | 6 | 0 | -2.270940 | 0.491171  | 1.643925 |
| 86 | 1 | 0 | -1.926307 | 1.516548  | 1.519859 |
| 87 | 1 | 0 | -2.702438 | 0.151629  | 0.700614 |
| 88 | 6 | 0 | -3.240699 | 0.381041  | 2.803847 |
| 89 | 1 | 0 | -4.197993 | 0.823789  | 2.517889 |
| 90 | 1 | 0 | -2.856575 | 0.921847  | 3.673962 |
| 91 | 7 | 0 | -1.092979 | -0.310160 | 1.941246 |
| 92 | 7 | 0 | -2.186825 | -1.818450 | 3.292788 |

---

#### Int4

---

| Center<br>Number | Atomic<br>Number | Atomic<br>Type | Coordinates (Angstroms) |           |           |
|------------------|------------------|----------------|-------------------------|-----------|-----------|
|                  |                  |                | X                       | Y         | Z         |
| 1                | 6                | 0              | 5.373456                | 2.040372  | -1.406732 |
| 2                | 6                | 0              | 4.057262                | 2.248029  | -1.825700 |
| 3                | 6                | 0              | 3.217859                | 1.161302  | -2.073844 |
| 4                | 6                | 0              | 3.709472                | -0.121786 | -1.867568 |
| 5                | 6                | 0              | 5.043141                | -0.334479 | -1.498818 |
| 6                | 6                | 0              | 5.877905                | 0.751674  | -1.249239 |
| 7                | 1                | 0              | 6.005641                | 2.894889  | -1.199345 |
| 8                | 1                | 0              | 3.675194                | 3.253050  | -1.940832 |
| 9                | 1                | 0              | 2.195039                | 1.326603  | -2.399900 |
| 10               | 1                | 0              | 6.909843                | 0.594820  | -0.951291 |
| 11               | 6                | 0              | -2.488986               | -2.622320 | -1.617639 |
| 12               | 6                | 0              | -3.818843               | -2.770296 | -1.245508 |
| 13               | 6                | 0              | -4.132889               | -2.985552 | 0.082637  |
| 14               | 6                | 0              | -3.119820               | -3.080214 | 1.032790  |
| 15               | 6                | 0              | -1.795668               | -2.912714 | 0.664051  |
| 16               | 6                | 0              | -1.475835               | -2.664858 | -0.667420 |
| 17               | 9                | 0              | -0.846606               | -2.968124 | 1.575536  |
| 18               | 9                | 0              | -3.436799               | -3.269299 | 2.312107  |
| 19               | 9                | 0              | -5.401286               | -3.063458 | 0.465534  |
| 20               | 9                | 0              | -4.782171               | -2.643743 | -2.153418 |
| 21               | 9                | 0              | -2.191959               | -2.372420 | -2.886833 |
| 22               | 6                | 0              | 4.044778                | -2.471584 | -1.531423 |
| 23               | 1                | 0              | 3.714390                | -2.575726 | -0.487701 |
| 24               | 8                | 0              | 3.972450                | -3.727255 | -2.180130 |

|    |    |   |           |           |           |
|----|----|---|-----------|-----------|-----------|
| 25 | 6  | 0 | 2.689688  | -4.063103 | -2.714710 |
| 26 | 1  | 0 | 2.690542  | -3.896933 | -3.797671 |
| 27 | 1  | 0 | 2.503855  | -5.121291 | -2.526122 |
| 28 | 6  | 0 | 1.576795  | -3.267054 | -2.098863 |
| 29 | 7  | 0 | 1.761978  | -1.925830 | -1.830487 |
| 30 | 7  | 0 | 0.419006  | -3.670717 | -1.682186 |
| 31 | 7  | 0 | -0.126439 | -2.560875 | -1.105261 |
| 32 | 6  | 0 | 0.686929  | -1.492530 | -1.149532 |
| 33 | 6  | 0 | 3.109912  | -1.452212 | -2.205914 |
| 34 | 1  | 0 | 3.144581  | -1.585175 | -3.294953 |
| 35 | 6  | 0 | 5.417689  | -1.805354 | -1.525401 |
| 36 | 1  | 0 | 6.023755  | -2.121063 | -0.678494 |
| 37 | 1  | 0 | 5.958064  | -2.046389 | -2.452696 |
| 38 | 6  | 0 | 2.123721  | 1.366939  | 0.705750  |
| 39 | 6  | 0 | 1.638529  | 0.063560  | 0.516393  |
| 40 | 6  | 0 | 2.269710  | -1.004971 | 1.139281  |
| 41 | 6  | 0 | 3.448580  | -0.808659 | 1.835139  |
| 42 | 6  | 0 | 3.994262  | 0.454618  | 1.981071  |
| 43 | 6  | 0 | 3.317337  | 1.535214  | 1.420587  |
| 44 | 1  | 0 | 1.849708  | -2.006173 | 1.051697  |
| 45 | 1  | 0 | 4.932001  | 0.608368  | 2.491609  |
| 46 | 35 | 0 | 4.384293  | -2.314785 | 2.492298  |
| 47 | 35 | 0 | 4.121555  | 3.236952  | 1.542685  |
| 48 | 8  | 0 | 1.486905  | 2.381681  | 0.057780  |
| 49 | 6  | 0 | 1.070616  | 3.549626  | 0.796849  |
| 50 | 1  | 0 | 1.201213  | 3.372504  | 1.870235  |
| 51 | 1  | 0 | 1.707730  | 4.391705  | 0.502470  |
| 52 | 6  | 0 | -0.694174 | 4.886542  | -0.267018 |
| 53 | 1  | 0 | 0.092660  | 5.518231  | -0.676974 |
| 54 | 6  | 0 | -2.089481 | 5.277026  | -0.598163 |
| 55 | 1  | 0 | -2.174506 | 6.299210  | -0.961642 |
| 56 | 1  | 0 | -2.793936 | 5.108273  | 0.211440  |
| 57 | 35 | 0 | -2.805126 | 4.171673  | -2.095068 |
| 58 | 6  | 0 | -0.372701 | 3.827522  | 0.480426  |
| 59 | 6  | 0 | -1.359341 | 2.845733  | 1.031795  |
| 60 | 1  | 0 | -2.343322 | 2.935173  | 0.562755  |
| 61 | 1  | 0 | -0.990090 | 1.821081  | 0.860057  |
| 62 | 1  | 0 | -1.468019 | 2.980160  | 2.119109  |
| 63 | 6  | 0 | 0.401618  | -0.179892 | -0.359881 |
| 64 | 8  | 0 | -0.712374 | -0.321229 | 0.353954  |
| 65 | 1  | 0 | 0.394704  | 0.618563  | -1.135304 |

|    |   |   |           |           |           |
|----|---|---|-----------|-----------|-----------|
| 66 | 6 | 0 | -3.269595 | 0.038211  | 2.107253  |
| 67 | 6 | 0 | -3.942541 | 0.127981  | 0.751682  |
| 68 | 6 | 0 | -3.969840 | 0.909032  | 3.160751  |
| 69 | 6 | 0 | -6.292806 | -0.039035 | 1.612895  |
| 70 | 6 | 0 | -5.087733 | 0.134950  | 3.863685  |
| 71 | 6 | 0 | -5.883348 | -0.744491 | 2.897183  |
| 72 | 1 | 0 | -3.243314 | -1.000619 | 2.439476  |
| 73 | 1 | 0 | -6.715687 | 0.952757  | 1.831460  |
| 74 | 1 | 0 | -4.365112 | 1.811510  | 2.684134  |
| 75 | 1 | 0 | -5.766080 | 0.843470  | 4.360453  |
| 76 | 1 | 0 | -2.230031 | 0.327730  | 1.949993  |
| 77 | 1 | 0 | -3.225566 | 1.241656  | 3.892113  |
| 78 | 1 | 0 | -7.074650 | -0.625836 | 1.125084  |
| 79 | 1 | 0 | -4.661084 | -0.498650 | 4.647288  |
| 80 | 1 | 0 | -6.801992 | -1.082441 | 3.381081  |
| 81 | 1 | 0 | -5.331906 | -1.657799 | 2.641791  |
| 82 | 6 | 0 | -5.808477 | 0.314293  | -0.780631 |
| 83 | 1 | 0 | -5.946083 | -0.673988 | -1.233602 |
| 84 | 1 | 0 | -6.791544 | 0.776206  | -0.659761 |
| 85 | 6 | 0 | -3.513064 | 0.579102  | -1.651319 |
| 86 | 1 | 0 | -2.776645 | 1.284882  | -2.041867 |
| 87 | 1 | 0 | -3.504061 | -0.315220 | -2.276547 |
| 88 | 6 | 0 | -4.902451 | 1.195817  | -1.619583 |
| 89 | 1 | 0 | -5.303590 | 1.283595  | -2.631671 |
| 90 | 1 | 0 | -4.847525 | 2.198605  | -1.188799 |
| 91 | 7 | 0 | -3.129341 | 0.259300  | -0.287374 |
| 92 | 7 | 0 | -5.252451 | 0.124949  | 0.579004  |
| 93 | 1 | 0 | -2.235152 | 0.161227  | -0.121044 |

---

**TS4**

---

| Center<br>Number | Atomic<br>Number | Atomic<br>Type | Coordinates (Angstroms) |           |           |
|------------------|------------------|----------------|-------------------------|-----------|-----------|
|                  |                  |                | X                       | Y         | Z         |
| 1                | 6                | 0              | 5.418397                | 1.976072  | -1.528660 |
| 2                | 6                | 0              | 4.090271                | 2.181190  | -1.910003 |
| 3                | 6                | 0              | 3.235846                | 1.099156  | -2.096826 |
| 4                | 6                | 0              | 3.725566                | -0.181192 | -1.864552 |
| 5                | 6                | 0              | 5.069095                | -0.397823 | -1.533660 |
| 6                | 6                | 0              | 5.918823                | 0.688822  | -1.349237 |

|    |    |   |           |           |           |
|----|----|---|-----------|-----------|-----------|
| 7  | 1  | 0 | 6.067295  | 2.831428  | -1.372285 |
| 8  | 1  | 0 | 3.715713  | 3.190009  | -2.046867 |
| 9  | 1  | 0 | 2.203089  | 1.263342  | -2.390408 |
| 10 | 1  | 0 | 6.958896  | 0.532733  | -1.080539 |
| 11 | 6  | 0 | -2.463853 | -2.669800 | -1.495642 |
| 12 | 6  | 0 | -3.801364 | -2.806632 | -1.152848 |
| 13 | 6  | 0 | -4.147285 | -2.961521 | 0.180072  |
| 14 | 6  | 0 | -3.158430 | -3.015250 | 1.158727  |
| 15 | 6  | 0 | -1.823162 | -2.876011 | 0.812074  |
| 16 | 6  | 0 | -1.477574 | -2.681939 | -0.520093 |
| 17 | 9  | 0 | -0.892534 | -2.909081 | 1.746689  |
| 18 | 9  | 0 | -3.509101 | -3.146299 | 2.436127  |
| 19 | 9  | 0 | -5.424582 | -3.032770 | 0.528050  |
| 20 | 9  | 0 | -4.741893 | -2.727193 | -2.089395 |
| 21 | 9  | 0 | -2.134095 | -2.468625 | -2.765398 |
| 22 | 6  | 0 | 4.051546  | -2.528643 | -1.477275 |
| 23 | 1  | 0 | 3.753630  | -2.609279 | -0.421305 |
| 24 | 8  | 0 | 3.958299  | -3.795788 | -2.095091 |
| 25 | 6  | 0 | 2.660217  | -4.136267 | -2.581241 |
| 26 | 1  | 0 | 2.627224  | -3.991869 | -3.667723 |
| 27 | 1  | 0 | 2.468331  | -5.188358 | -2.366239 |
| 28 | 6  | 0 | 1.568194  | -3.318647 | -1.951338 |
| 29 | 7  | 0 | 1.757059  | -1.972553 | -1.711931 |
| 30 | 7  | 0 | 0.416240  | -3.715302 | -1.508132 |
| 31 | 7  | 0 | -0.121566 | -2.595071 | -0.945005 |
| 32 | 6  | 0 | 0.692473  | -1.527716 | -1.025394 |
| 33 | 6  | 0 | 3.101605  | -1.516493 | -2.144535 |
| 34 | 1  | 0 | 3.095313  | -1.679150 | -3.230090 |
| 35 | 6  | 0 | 5.427934  | -1.871524 | -1.531480 |
| 36 | 1  | 0 | 6.056111  | -2.165294 | -0.687677 |
| 37 | 1  | 0 | 5.940184  | -2.144413 | -2.460884 |
| 38 | 6  | 0 | 2.186673  | 1.394640  | 0.679124  |
| 39 | 6  | 0 | 1.707252  | 0.082747  | 0.553422  |
| 40 | 6  | 0 | 2.369973  | -0.966247 | 1.180432  |
| 41 | 6  | 0 | 3.576852  | -0.739238 | 1.825165  |
| 42 | 6  | 0 | 4.109698  | 0.537673  | 1.908560  |
| 43 | 6  | 0 | 3.402796  | 1.594861  | 1.346220  |
| 44 | 1  | 0 | 1.961327  | -1.972378 | 1.143341  |
| 45 | 1  | 0 | 5.069138  | 0.714856  | 2.378861  |
| 46 | 35 | 0 | 4.558021  | -2.211217 | 2.487651  |
| 47 | 35 | 0 | 4.202246  | 3.301590  | 1.385250  |

|    |    |   |           |           |           |
|----|----|---|-----------|-----------|-----------|
| 48 | 8  | 0 | 1.517337  | 2.379763  | 0.026642  |
| 49 | 6  | 0 | 1.121611  | 3.572875  | 0.741098  |
| 50 | 1  | 0 | 1.301986  | 3.429006  | 1.812591  |
| 51 | 1  | 0 | 1.737646  | 4.403256  | 0.390200  |
| 52 | 6  | 0 | -0.703840 | 4.850575  | -0.292107 |
| 53 | 1  | 0 | 0.054282  | 5.476149  | -0.756568 |
| 54 | 6  | 0 | -2.122948 | 5.201846  | -0.570780 |
| 55 | 1  | 0 | -2.243800 | 6.215391  | -0.943276 |
| 56 | 1  | 0 | -2.786346 | 5.027200  | 0.273359  |
| 57 | 35 | 0 | -2.866460 | 4.053904  | -2.013510 |
| 58 | 6  | 0 | -0.336242 | 3.821835  | 0.478926  |
| 59 | 6  | 0 | -1.295180 | 2.859231  | 1.117196  |
| 60 | 1  | 0 | -2.246169 | 2.807959  | 0.580175  |
| 61 | 1  | 0 | -0.862541 | 1.853355  | 1.120309  |
| 62 | 1  | 0 | -1.490370 | 3.141702  | 2.159316  |
| 63 | 6  | 0 | 0.451077  | -0.201185 | -0.270176 |
| 64 | 8  | 0 | -0.623220 | -0.338403 | 0.558406  |
| 65 | 1  | 0 | 0.348428  | 0.588928  | -1.032386 |
| 66 | 6  | 0 | -3.484601 | 0.191645  | 2.022361  |
| 67 | 6  | 0 | -4.057563 | 0.196387  | 0.617488  |
| 68 | 6  | 0 | -4.263383 | 1.088513  | 2.993293  |
| 69 | 6  | 0 | -6.460542 | -0.033176 | 1.392688  |
| 70 | 6  | 0 | -5.389185 | 0.318750  | 3.689346  |
| 71 | 6  | 0 | -6.095298 | -0.646959 | 2.737370  |
| 72 | 1  | 0 | -3.446260 | -0.829156 | 2.414835  |
| 73 | 1  | 0 | -6.939815 | 0.944750  | 1.537315  |
| 74 | 1  | 0 | -4.668472 | 1.947259  | 2.445062  |
| 75 | 1  | 0 | -6.114922 | 1.024089  | 4.106925  |
| 76 | 1  | 0 | -2.449613 | 0.520126  | 1.927914  |
| 77 | 1  | 0 | -3.573320 | 1.496073  | 3.736452  |
| 78 | 1  | 0 | -7.195247 | -0.682018 | 0.906374  |
| 79 | 1  | 0 | -4.979788 | -0.251764 | 4.529536  |
| 80 | 1  | 0 | -7.029410 | -0.989109 | 3.192336  |
| 81 | 1  | 0 | -5.497406 | -1.548077 | 2.569265  |
| 82 | 6  | 0 | -5.892786 | 0.234888  | -0.976663 |
| 83 | 1  | 0 | -6.016714 | -0.772300 | -1.393619 |
| 84 | 1  | 0 | -6.880635 | 0.697683  | -0.918755 |
| 85 | 6  | 0 | -3.561209 | 0.491782  | -1.748767 |
| 86 | 1  | 0 | -2.829353 | 1.162719  | -2.205702 |
| 87 | 1  | 0 | -3.517818 | -0.460170 | -2.291908 |
| 88 | 6  | 0 | -4.961489 | 1.075105  | -1.831709 |



|    |   |   |           |          |           |
|----|---|---|-----------|----------|-----------|
| 89 | 1 | 0 | -5.314504 | 1.088316 | -2.864902 |
| 90 | 1 | 0 | -4.947908 | 2.104899 | -1.461673 |
| 91 | 7 | 0 | -3.182928 | 0.311744 | -0.354111 |
| 92 | 7 | 0 | -5.381121 | 0.118800 | 0.398389  |
| 93 | 1 | 0 | -1.864473 | 0.036243 | 0.027709  |

---

### Int5

| Center<br>Number | Atomic<br>Number | Atomic<br>Type | Coordinates (Angstroms) |           |           |
|------------------|------------------|----------------|-------------------------|-----------|-----------|
|                  |                  |                | X                       | Y         | Z         |
| 1                | 6                | 0              | 5.372825                | 2.026968  | -1.397102 |
| 2                | 6                | 0              | 4.058075                | 2.242022  | -1.816869 |
| 3                | 6                | 0              | 3.213686                | 1.169985  | -2.068473 |
| 4                | 6                | 0              | 3.698860                | -0.115981 | -1.854827 |
| 5                | 6                | 0              | 5.031087                | -0.346035 | -1.485286 |
| 6                | 6                | 0              | 5.870862                | 0.735460  | -1.242241 |
| 7                | 1                | 0              | 6.018943                | 2.877890  | -1.197007 |
| 8                | 1                | 0              | 3.691029                | 3.259149  | -1.939920 |
| 9                | 1                | 0              | 2.192008                | 1.341036  | -2.395140 |
| 10               | 1                | 0              | 6.901728                | 0.572880  | -0.943651 |
| 11               | 6                | 0              | -2.521989               | -2.626978 | -1.627174 |
| 12               | 6                | 0              | -3.852897               | -2.759403 | -1.256710 |
| 13               | 6                | 0              | -4.169296               | -2.966366 | 0.080608  |
| 14               | 6                | 0              | -3.157676               | -3.078245 | 1.031520  |
| 15               | 6                | 0              | -1.832377               | -2.926264 | 0.654490  |
| 16               | 6                | 0              | -1.520035               | -2.686710 | -0.676074 |
| 17               | 9                | 0              | -0.874486               | -2.978513 | 1.566796  |
| 18               | 9                | 0              | -3.476851               | -3.268892 | 2.310059  |
| 19               | 9                | 0              | -5.438434               | -3.039034 | 0.452057  |
| 20               | 9                | 0              | -4.814688               | -2.625977 | -2.165265 |
| 21               | 9                | 0              | -2.222482               | -2.375446 | -2.895461 |
| 22               | 6                | 0              | 4.012412                | -2.478150 | -1.534078 |
| 23               | 1                | 0              | 3.680452                | -2.593218 | -0.490952 |
| 24               | 8                | 0              | 3.944677                | -3.721891 | -2.195888 |
| 25               | 6                | 0              | 2.660834                | -4.050227 | -2.722554 |
| 26               | 1                | 0              | 2.653604                | -3.871413 | -3.805100 |
| 27               | 1                | 0              | 2.459688                | -5.107918 | -2.546727 |
| 28               | 6                | 0              | 1.551191                | -3.250296 | -2.095879 |
| 29               | 7                | 0              | 1.722601                | -1.910604 | -1.814071 |

|    |    |   |           |           |           |
|----|----|---|-----------|-----------|-----------|
| 30 | 7  | 0 | 0.390998  | -3.669335 | -1.691356 |
| 31 | 7  | 0 | -0.169663 | -2.568214 | -1.112299 |
| 32 | 6  | 0 | 0.638939  | -1.493711 | -1.143160 |
| 33 | 6  | 0 | 3.083196  | -1.442635 | -2.197004 |
| 34 | 1  | 0 | 3.108313  | -1.573098 | -3.286334 |
| 35 | 6  | 0 | 5.388530  | -1.818604 | -1.525076 |
| 36 | 1  | 0 | 5.992203  | -2.139314 | -0.668338 |
| 37 | 1  | 0 | 5.928655  | -2.060020 | -2.442417 |
| 38 | 6  | 0 | 2.097726  | 1.354247  | 0.700493  |
| 39 | 6  | 0 | 1.606405  | 0.053688  | 0.517489  |
| 40 | 6  | 0 | 2.231754  | -1.029387 | 1.128392  |
| 41 | 6  | 0 | 3.420863  | -0.840509 | 1.825898  |
| 42 | 6  | 0 | 3.962547  | 0.429786  | 1.965448  |
| 43 | 6  | 0 | 3.291427  | 1.514996  | 1.416919  |
| 44 | 1  | 0 | 1.816985  | -2.028361 | 1.047964  |
| 45 | 1  | 0 | 4.910507  | 0.577722  | 2.477291  |
| 46 | 35 | 0 | 4.358627  | -2.342769 | 2.480340  |
| 47 | 35 | 0 | 4.123738  | 3.202463  | 1.543947  |
| 48 | 8  | 0 | 1.456459  | 2.363648  | 0.064342  |
| 49 | 6  | 0 | 1.085179  | 3.561729  | 0.785890  |
| 50 | 1  | 0 | 1.233864  | 3.391324  | 1.858992  |
| 51 | 1  | 0 | 1.736605  | 4.371431  | 0.464158  |
| 52 | 6  | 0 | -0.672040 | 4.909766  | -0.276475 |
| 53 | 1  | 0 | 0.118221  | 5.518647  | -0.704139 |
| 54 | 6  | 0 | -2.075133 | 5.297829  | -0.598071 |
| 55 | 1  | 0 | -2.154841 | 6.321279  | -0.949149 |
| 56 | 1  | 0 | -2.771239 | 5.120496  | 0.220415  |
| 57 | 35 | 0 | -2.784632 | 4.199557  | -2.088361 |
| 58 | 6  | 0 | -0.356440 | 3.857366  | 0.488724  |
| 59 | 6  | 0 | -1.358334 | 2.909005  | 1.086759  |
| 60 | 1  | 0 | -2.301622 | 2.894365  | 0.526850  |
| 61 | 1  | 0 | -0.953937 | 1.892703  | 1.072929  |
| 62 | 1  | 0 | -1.567112 | 3.171612  | 2.134395  |
| 63 | 6  | 0 | 0.389189  | -0.191672 | -0.370602 |
| 64 | 8  | 0 | -0.736254 | -0.339405 | 0.421765  |
| 65 | 1  | 0 | 0.296949  | 0.628846  | -1.094109 |
| 66 | 6  | 0 | -3.243344 | 0.068109  | 2.133469  |
| 67 | 6  | 0 | -3.814486 | 0.154245  | 0.727490  |
| 68 | 6  | 0 | -3.990423 | 0.929918  | 3.158349  |
| 69 | 6  | 0 | -6.226479 | -0.043273 | 1.555887  |
| 70 | 6  | 0 | -5.112781 | 0.149577  | 3.848278  |

|    |   |   |           |           |           |
|----|---|---|-----------|-----------|-----------|
| 71 | 6 | 0 | -5.861720 | -0.743746 | 2.858854  |
| 72 | 1 | 0 | -3.222442 | -0.971663 | 2.483192  |
| 73 | 1 | 0 | -6.664784 | 0.940087  | 1.766420  |
| 74 | 1 | 0 | -4.400871 | 1.815541  | 2.653500  |
| 75 | 1 | 0 | -5.808221 | 0.840246  | 4.326060  |
| 76 | 1 | 0 | -2.202196 | 0.382866  | 2.057979  |
| 77 | 1 | 0 | -3.285162 | 1.307238  | 3.901294  |
| 78 | 1 | 0 | -7.000688 | -0.635102 | 1.055870  |
| 79 | 1 | 0 | -4.689976 | -0.477995 | 4.640774  |
| 80 | 1 | 0 | -6.802462 | -1.078323 | 3.311009  |
| 81 | 1 | 0 | -5.294447 | -1.649180 | 2.631813  |
| 82 | 6 | 0 | -5.707987 | 0.343383  | -0.796242 |
| 83 | 1 | 0 | -5.879860 | -0.622996 | -1.291739 |
| 84 | 1 | 0 | -6.678871 | 0.829753  | -0.685195 |
| 85 | 6 | 0 | -3.390529 | 0.579032  | -1.594021 |
| 86 | 1 | 0 | -2.650348 | 1.252248  | -2.042160 |
| 87 | 1 | 0 | -3.395288 | -0.333792 | -2.211441 |
| 88 | 6 | 0 | -4.766892 | 1.212437  | -1.612148 |
| 89 | 1 | 0 | -5.136555 | 1.314553  | -2.634390 |
| 90 | 1 | 0 | -4.717541 | 2.213911  | -1.168879 |
| 91 | 7 | 0 | -2.939656 | 0.283894  | -0.230407 |
| 92 | 7 | 0 | -5.164314 | 0.118097  | 0.543439  |
| 93 | 1 | 0 | -1.546718 | -0.040282 | 0.056550  |

---

**TS5**

---

| Center<br>Number | Atomic<br>Number | Atomic<br>Type | Coordinates (Angstroms) |           |           |
|------------------|------------------|----------------|-------------------------|-----------|-----------|
|                  |                  |                | X                       | Y         | Z         |
| 1                | 6                | 0              | 5.194218                | 1.773497  | -0.938746 |
| 2                | 6                | 0              | 3.975971                | 1.898172  | -0.269999 |
| 3                | 6                | 0              | 2.839673                | 1.249372  | -0.742876 |
| 4                | 6                | 0              | 2.934536                | 0.433731  | -1.866848 |
| 5                | 6                | 0              | 4.141008                | 0.378890  | -2.581678 |
| 6                | 6                | 0              | 5.274600                | 1.033785  | -2.113906 |
| 7                | 1                | 0              | 6.076696                | 2.271189  | -0.551381 |
| 8                | 1                | 0              | 3.910158                | 2.494217  | 0.634732  |
| 9                | 1                | 0              | 1.908041                | 1.352002  | -0.203651 |
| 10               | 1                | 0              | 6.209303                | 0.964260  | -2.661151 |
| 11               | 6                | 0              | -3.277010               | -2.431081 | -1.103540 |

|    |    |   |           |           |           |
|----|----|---|-----------|-----------|-----------|
| 12 | 6  | 0 | -4.399579 | -2.748845 | -0.352369 |
| 13 | 6  | 0 | -4.241186 | -3.324438 | 0.903896  |
| 14 | 6  | 0 | -2.970046 | -3.582145 | 1.410886  |
| 15 | 6  | 0 | -1.855777 | -3.264999 | 0.651253  |
| 16 | 6  | 0 | -2.007307 | -2.686865 | -0.601673 |
| 17 | 9  | 0 | -0.637450 | -3.435481 | 1.139735  |
| 18 | 9  | 0 | -2.833441 | -4.111492 | 2.616025  |
| 19 | 9  | 0 | -5.305849 | -3.618386 | 1.626789  |
| 20 | 9  | 0 | -5.611410 | -2.482893 | -0.817101 |
| 21 | 9  | 0 | -3.421091 | -1.833250 | -2.283224 |
| 22 | 6  | 0 | 2.764267  | -1.218070 | -3.577094 |
| 23 | 1  | 0 | 3.072747  | -2.095147 | -2.980526 |
| 24 | 8  | 0 | 2.033421  | -1.621327 | -4.706212 |
| 25 | 6  | 0 | 1.050014  | -2.560412 | -4.345366 |
| 26 | 1  | 0 | 0.308989  | -2.611062 | -5.144576 |
| 27 | 1  | 0 | 1.493752  | -3.558420 | -4.217749 |
| 28 | 6  | 0 | 0.363783  | -2.208903 | -3.045921 |
| 29 | 7  | 0 | 0.853589  | -1.284101 | -2.134782 |
| 30 | 7  | 0 | -0.688027 | -2.811549 | -2.591099 |
| 31 | 7  | 0 | -0.868982 | -2.281892 | -1.348026 |
| 32 | 6  | 0 | 0.050710  | -1.351347 | -1.046455 |
| 33 | 6  | 0 | 1.891328  | -0.331955 | -2.664107 |
| 34 | 1  | 0 | 1.315135  | 0.371571  | -3.278935 |
| 35 | 6  | 0 | 3.996716  | -0.386250 | -3.875615 |
| 36 | 1  | 0 | 4.863648  | -0.996581 | -4.133585 |
| 37 | 1  | 0 | 3.791983  | 0.293484  | -4.711493 |
| 38 | 6  | 0 | 1.433814  | -0.048250 | 2.257624  |
| 39 | 6  | 0 | 1.309871  | -0.683435 | 1.006778  |
| 40 | 6  | 0 | 2.415728  | -1.379368 | 0.521703  |
| 41 | 6  | 0 | 3.646768  | -1.310098 | 1.156817  |
| 42 | 6  | 0 | 3.806591  | -0.612383 | 2.342487  |
| 43 | 6  | 0 | 2.679930  | -0.007177 | 2.889087  |
| 44 | 1  | 0 | 2.364984  | -1.934057 | -0.405844 |
| 45 | 1  | 0 | 4.769922  | -0.536892 | 2.831286  |
| 46 | 35 | 0 | 5.136689  | -2.069513 | 0.287958  |
| 47 | 35 | 0 | 2.826264  | 0.940640  | 4.508065  |
| 48 | 8  | 0 | 0.354306  | 0.451534  | 2.916076  |
| 49 | 6  | 0 | -0.105227 | 1.766199  | 2.624296  |
| 50 | 1  | 0 | 0.262959  | 2.440655  | 3.409586  |
| 51 | 1  | 0 | 0.283111  | 2.112307  | 1.656465  |
| 52 | 6  | 0 | -2.301941 | 2.366320  | 1.664092  |

|    |    |   |           |           |           |
|----|----|---|-----------|-----------|-----------|
| 53 | 1  | 0 | -1.767420 | 2.932422  | 0.907622  |
| 54 | 6  | 0 | -3.779417 | 2.302364  | 1.506089  |
| 55 | 1  | 0 | -4.168178 | 3.058595  | 0.826362  |
| 56 | 1  | 0 | -4.338764 | 2.316175  | 2.438710  |
| 57 | 35 | 0 | -4.279320 | 0.557609  | 0.672875  |
| 58 | 6  | 0 | -1.614173 | 1.712977  | 2.609516  |
| 59 | 6  | 0 | -2.236178 | 0.816983  | 3.638593  |
| 60 | 1  | 0 | -3.318492 | 0.929390  | 3.701502  |
| 61 | 1  | 0 | -2.005859 | -0.220835 | 3.376527  |
| 62 | 1  | 0 | -1.798163 | 0.998980  | 4.624029  |
| 63 | 6  | 0 | 0.069309  | -0.485627 | 0.160514  |
| 64 | 8  | 0 | -1.113288 | -0.683058 | 0.889384  |
| 65 | 1  | 0 | -0.052544 | 0.723147  | -0.535195 |
| 66 | 6  | 0 | 0.213645  | 3.681411  | -0.943161 |
| 67 | 6  | 0 | -0.980411 | 2.869889  | -1.415479 |
| 68 | 6  | 0 | 0.401779  | 5.029633  | -1.650699 |
| 69 | 6  | 0 | -2.488363 | 4.914612  | -1.564239 |
| 70 | 6  | 0 | -0.349400 | 6.159270  | -0.945878 |
| 71 | 6  | 0 | -1.742806 | 5.713854  | -0.502018 |
| 72 | 1  | 0 | 0.156946  | 3.837906  | 0.142429  |
| 73 | 1  | 0 | -2.385704 | 5.397935  | -2.546224 |
| 74 | 1  | 0 | 0.066291  | 4.938370  | -2.690258 |
| 75 | 1  | 0 | -0.431756 | 7.020361  | -1.616558 |
| 76 | 1  | 0 | 1.076421  | 3.042818  | -1.126283 |
| 77 | 1  | 0 | 1.468717  | 5.261672  | -1.695728 |
| 78 | 1  | 0 | -3.555110 | 4.929098  | -1.319147 |
| 79 | 1  | 0 | 0.216882  | 6.494993  | -0.071071 |
| 80 | 1  | 0 | -2.352270 | 6.591252  | -0.267213 |
| 81 | 1  | 0 | -1.696845 | 5.126717  | 0.422506  |
| 82 | 6  | 0 | -3.264976 | 2.708001  | -2.274109 |
| 83 | 1  | 0 | -3.936077 | 2.369481  | -1.473990 |
| 84 | 1  | 0 | -3.827243 | 3.375899  | -2.931815 |
| 85 | 6  | 0 | -1.810778 | 0.734876  | -2.129295 |
| 86 | 1  | 0 | -1.323220 | -0.053800 | -2.713039 |
| 87 | 1  | 0 | -2.405336 | 0.247671  | -1.346670 |
| 88 | 6  | 0 | -2.734990 | 1.517157  | -3.043308 |
| 89 | 1  | 0 | -3.560201 | 0.883799  | -3.376843 |
| 90 | 1  | 0 | -2.186827 | 1.860972  | -3.926572 |
| 91 | 7  | 0 | -0.774444 | 1.578956  | -1.532290 |
| 92 | 7  | 0 | -2.155956 | 3.481848  | -1.695819 |
| 93 | 1  | 0 | -1.677601 | 0.101147  | 0.826926  |

---

**Int2**

---

| Center<br>Number | Atomic<br>Number | Atomic<br>Type | Coordinates (Angstroms) |           |           |
|------------------|------------------|----------------|-------------------------|-----------|-----------|
|                  |                  |                | X                       | Y         | Z         |
| 1                | 6                | 0              | 4.427177                | 0.226657  | -0.298533 |
| 2                | 6                | 0              | 5.760666                | 0.031286  | -0.652219 |
| 3                | 6                | 0              | 6.766913                | 0.655893  | 0.075181  |
| 4                | 6                | 0              | 6.409372                | 1.466040  | 1.153358  |
| 5                | 6                | 0              | 5.070160                | 1.642998  | 1.503924  |
| 6                | 6                | 0              | 4.057113                | 1.016580  | 0.779213  |
| 7                | 6                | 0              | 3.518945                | -0.524003 | -1.245172 |
| 8                | 6                | 0              | 4.475547                | -1.556578 | -1.926386 |
| 9                | 6                | 0              | 5.863483                | -0.888488 | -1.845561 |
| 10               | 1                | 0              | 7.811418                | 0.510461  | -0.184036 |
| 11               | 1                | 0              | 7.184452                | 1.959002  | 1.731596  |
| 12               | 1                | 0              | 4.806966                | 2.274307  | 2.345597  |
| 13               | 1                | 0              | 3.013358                | 1.119971  | 1.060904  |
| 14               | 1                | 0              | 4.170164                | -1.754925 | -2.955729 |
| 15               | 1                | 0              | 6.640922                | -1.651901 | -1.756168 |
| 16               | 1                | 0              | 3.055577                | 0.147058  | -1.969101 |
| 17               | 1                | 0              | 6.059979                | -0.318931 | -2.761525 |
| 18               | 6                | 0              | 2.724951                | -2.353952 | 0.163461  |
| 19               | 6                | 0              | 1.103887                | -1.012703 | -0.465350 |
| 20               | 7                | 0              | 1.655085                | -2.881435 | 0.673283  |
| 21               | 7                | 0              | 2.437372                | -1.222483 | -0.544773 |
| 22               | 7                | 0              | 0.649026                | -2.038143 | 0.278395  |
| 23               | 6                | 0              | 4.122417                | -2.871943 | 0.073353  |
| 24               | 1                | 0              | 4.803958                | -2.275524 | 0.692343  |
| 25               | 1                | 0              | 4.154224                | -3.913341 | 0.393378  |
| 26               | 8                | 0              | 4.472573                | -2.836504 | -1.298839 |
| 27               | 6                | 0              | -0.694808               | -2.412105 | 0.638196  |
| 28               | 6                | 0              | -1.423665               | -3.175180 | -0.278989 |
| 29               | 6                | 0              | -1.156059               | -2.119928 | 1.926415  |
| 30               | 6                | 0              | -2.708109               | -3.573599 | 0.091780  |
| 31               | 6                | 0              | -2.443693               | -2.548385 | 2.248299  |
| 32               | 6                | 0              | -3.235676               | -3.261409 | 1.345765  |
| 33               | 1                | 0              | -3.301875               | -4.152364 | -0.610770 |
| 34               | 1                | 0              | -2.834808               | -2.323150 | 3.237338  |

|    |   |   |           |           |           |
|----|---|---|-----------|-----------|-----------|
| 35 | 6 | 0 | -0.826882 | -3.567348 | -1.605135 |
| 36 | 1 | 0 | 0.105148  | -4.121529 | -1.455875 |
| 37 | 1 | 0 | -1.517475 | -4.199667 | -2.164668 |
| 38 | 1 | 0 | -0.595184 | -2.689258 | -2.217683 |
| 39 | 6 | 0 | -4.628398 | -3.686227 | 1.732944  |
| 40 | 1 | 0 | -4.604270 | -4.363315 | 2.591711  |
| 41 | 1 | 0 | -5.232342 | -2.819641 | 2.017850  |
| 42 | 1 | 0 | -5.132514 | -4.198023 | 0.910944  |
| 43 | 6 | 0 | -0.282372 | -1.421923 | 2.931302  |
| 44 | 1 | 0 | 0.079619  | -0.461356 | 2.554068  |
| 45 | 1 | 0 | -0.831221 | -1.258153 | 3.860012  |
| 46 | 1 | 0 | 0.593367  | -2.040201 | 3.153930  |
| 47 | 6 | 0 | 0.429566  | 0.093871  | -1.227128 |
| 48 | 8 | 0 | 1.151637  | 1.067365  | -1.528780 |
| 49 | 6 | 0 | -0.952455 | 0.026942  | -1.497836 |
| 50 | 1 | 0 | -1.480960 | -0.886825 | -1.255792 |
| 51 | 6 | 0 | -1.447125 | 0.799288  | -2.693022 |
| 52 | 1 | 0 | -1.378233 | 0.183625  | -3.597440 |
| 53 | 1 | 0 | -2.492546 | 1.102110  | -2.584539 |
| 54 | 1 | 0 | -0.824880 | 1.682969  | -2.841496 |
| 55 | 6 | 0 | 0.489761  | 2.186627  | 0.812958  |
| 56 | 8 | 0 | 0.830326  | 1.132155  | 1.377142  |
| 57 | 6 | 0 | -0.739075 | 2.394828  | 0.120731  |
| 58 | 6 | 0 | -1.581269 | 1.276675  | 0.153803  |
| 59 | 1 | 0 | -1.281041 | 0.529751  | 0.885234  |
| 60 | 6 | 0 | -3.046304 | 1.249876  | -0.087564 |
| 61 | 6 | 0 | -3.694463 | 0.004078  | -0.019798 |
| 62 | 6 | 0 | -3.829055 | 2.391365  | -0.307642 |
| 63 | 6 | 0 | -5.060444 | -0.116867 | -0.203203 |
| 64 | 1 | 0 | -3.104804 | -0.883974 | 0.182079  |
| 65 | 6 | 0 | -5.204383 | 2.290887  | -0.491837 |
| 66 | 1 | 0 | -3.373936 | 3.372501  | -0.308358 |
| 67 | 6 | 0 | -5.795515 | 1.038050  | -0.446301 |
| 68 | 1 | 0 | -5.562235 | -1.075946 | -0.162166 |
| 69 | 1 | 0 | -5.820690 | 3.164971  | -0.661157 |
| 70 | 7 | 0 | -7.245750 | 0.927133  | -0.644572 |
| 71 | 8 | 0 | -7.739254 | -0.185297 | -0.581296 |
| 72 | 8 | 0 | -7.867404 | 1.951537  | -0.860295 |
| 73 | 6 | 0 | 1.484680  | 3.361159  | 0.910298  |
| 74 | 9 | 0 | 2.341798  | 3.169984  | 1.921179  |
| 75 | 9 | 0 | 2.204698  | 3.509015  | -0.208717 |

|    |   |   |           |          |           |
|----|---|---|-----------|----------|-----------|
| 76 | 9 | 0 | 0.862297  | 4.528356 | 1.146198  |
| 77 | 6 | 0 | -0.958005 | 3.624157 | -0.730219 |
| 78 | 1 | 0 | -1.377885 | 4.464918 | -0.166033 |
| 79 | 1 | 0 | -0.015227 | 3.960531 | -1.166574 |
| 80 | 1 | 0 | -1.630614 | 3.400394 | -1.560121 |

---

**TS6R**

| Center<br>Number | Atomic<br>Number | Atomic<br>Type | Coordinates (Angstroms) |          |           |
|------------------|------------------|----------------|-------------------------|----------|-----------|
|                  |                  |                | X                       | Y        | Z         |
| 1                | 6                | 0              | -5.282571               | 1.944367 | 0.254579  |
| 2                | 6                | 0              | -4.795489               | 0.960382 | -0.604426 |
| 3                | 6                | 0              | -3.515390               | 1.062914 | -1.143871 |
| 4                | 6                | 0              | -2.710487               | 2.134170 | -0.773514 |
| 5                | 6                | 0              | -3.248874               | 3.186132 | -0.017452 |
| 6                | 6                | 0              | -4.524076               | 3.080330 | 0.524503  |
| 7                | 1                | 0              | -6.276717               | 1.845561 | 0.677918  |
| 8                | 1                | 0              | -5.408544               | 0.102517 | -0.863508 |
| 9                | 1                | 0              | -3.172134               | 0.323371 | -1.859287 |
| 10               | 1                | 0              | -4.931633               | 3.887572 | 1.125411  |
| 11               | 6                | 0              | 4.247119                | 0.713383 | -0.410285 |
| 12               | 6                | 0              | 5.361962                | 0.446949 | 0.367916  |
| 13               | 6                | 0              | 5.224760                | 0.348353 | 1.743523  |
| 14               | 6                | 0              | 3.986819                | 0.556580 | 2.345649  |
| 15               | 6                | 0              | 2.890516                | 0.878646 | 1.564838  |
| 16               | 6                | 0              | 3.005467                | 0.916273 | 0.177467  |
| 17               | 9                | 0              | 1.729300                | 1.170827 | 2.143024  |
| 18               | 9                | 0              | 3.877871                | 0.501917 | 3.668725  |
| 19               | 9                | 0              | 6.276617                | 0.055687 | 2.495199  |
| 20               | 9                | 0              | 6.534638                | 0.213693 | -0.205388 |
| 21               | 9                | 0              | 4.361847                | 0.726431 | -1.733380 |
| 22               | 6                | 0              | -1.060422               | 3.878565 | -0.581686 |
| 23               | 1                | 0              | -0.431170               | 3.592344 | 0.276668  |
| 24               | 8                | 0              | -0.356669               | 4.772800 | -1.420232 |
| 25               | 6                | 0              | 0.543731                | 4.103333 | -2.304136 |
| 26               | 1                | 0              | 0.088039                | 4.008158 | -3.296958 |
| 27               | 1                | 0              | 1.455687                | 4.695399 | -2.389121 |
| 28               | 6                | 0              | 0.913401                | 2.761100 | -1.748262 |
| 29               | 7                | 0              | -0.064895               | 1.841652 | -1.368213 |



|    |    |   |           |           |           |
|----|----|---|-----------|-----------|-----------|
| 30 | 7  | 0 | 2.088173  | 2.458344  | -1.328154 |
| 31 | 7  | 0 | 1.913897  | 1.285922  | -0.638184 |
| 32 | 6  | 0 | 0.595505  | 0.878605  | -0.598656 |
| 33 | 6  | 0 | -1.385218 | 2.571931  | -1.344015 |
| 34 | 1  | 0 | -1.554127 | 2.809146  | -2.401443 |
| 35 | 6  | 0 | -2.382611 | 4.424779  | -0.064681 |
| 36 | 1  | 0 | -2.279926 | 4.939365  | 0.893056  |
| 37 | 1  | 0 | -2.792290 | 5.136653  | -0.790403 |
| 38 | 6  | 0 | -2.049860 | -1.423415 | -0.714912 |
| 39 | 6  | 0 | -1.178370 | -0.771303 | 0.161299  |
| 40 | 6  | 0 | -1.567019 | -0.560458 | 1.489848  |
| 41 | 6  | 0 | -2.803595 | -0.986774 | 1.937193  |
| 42 | 6  | 0 | -3.670928 | -1.663055 | 1.084901  |
| 43 | 6  | 0 | -3.286955 | -1.869966 | -0.226910 |
| 44 | 1  | 0 | -0.869600 | -0.074352 | 2.163748  |
| 45 | 1  | 0 | -4.642407 | -1.997905 | 1.427634  |
| 46 | 35 | 0 | -3.334785 | -0.650725 | 3.718640  |
| 47 | 35 | 0 | -4.513166 | -2.644640 | -1.427944 |
| 48 | 8  | 0 | -1.830872 | -1.620749 | -2.036293 |
| 49 | 6  | 0 | -0.634261 | -1.145235 | -2.646255 |
| 50 | 1  | 0 | -0.670614 | -1.574427 | -3.652226 |
| 51 | 1  | 0 | -0.663929 | -0.051472 | -2.743844 |
| 52 | 6  | 0 | 1.872168  | -1.180339 | -2.422785 |
| 53 | 1  | 0 | 1.986836  | -0.161749 | -2.787191 |
| 54 | 6  | 0 | 3.012105  | -2.003607 | -2.403365 |
| 55 | 1  | 0 | 3.919444  | -1.609847 | -2.847060 |
| 56 | 1  | 0 | 2.890527  | -3.074067 | -2.509934 |
| 57 | 35 | 0 | 3.919933  | -2.430825 | -0.278286 |
| 58 | 6  | 0 | 0.618562  | -1.612318 | -1.953418 |
| 59 | 6  | 0 | 0.524000  | -3.018869 | -1.400232 |
| 60 | 1  | 0 | 1.419570  | -3.293572 | -0.842202 |
| 61 | 1  | 0 | -0.341620 | -3.160440 | -0.754267 |
| 62 | 1  | 0 | 0.416478  | -3.710080 | -2.245947 |
| 63 | 6  | 0 | 0.234765  | -0.433731 | -0.190916 |
| 64 | 8  | 0 | 1.094784  | -1.025498 | 0.719500  |
| 65 | 1  | 0 | 1.889668  | -1.412712 | 0.297402  |

---

**TS6S**

---

| Center | Atomic | Atomic | Coordinates (Angstroms) |  |  |
|--------|--------|--------|-------------------------|--|--|
|--------|--------|--------|-------------------------|--|--|

| Number | Number | Type | X         | Y         | Z         |
|--------|--------|------|-----------|-----------|-----------|
| 1      | 6      | 0    | -5.000909 | 1.632102  | -0.424804 |
| 2      | 6      | 0    | -4.219953 | 0.713102  | -1.125200 |
| 3      | 6      | 0    | -2.870983 | 0.967215  | -1.347952 |
| 4      | 6      | 0    | -2.289014 | 2.119879  | -0.840276 |
| 5      | 6      | 0    | -3.095112 | 3.076068  | -0.207190 |
| 6      | 6      | 0    | -4.444917 | 2.829274  | 0.015542  |
| 7      | 1      | 0    | -6.047583 | 1.419193  | -0.234361 |
| 8      | 1      | 0    | -4.647351 | -0.225319 | -1.467833 |
| 9      | 1      | 0    | -2.268873 | 0.245057  | -1.867972 |
| 10     | 1      | 0    | -5.053831 | 3.564471  | 0.532560  |
| 11     | 6      | 0    | 4.334455  | 0.225166  | 0.851202  |
| 12     | 6      | 0    | 5.176993  | -0.579251 | 1.608907  |
| 13     | 6      | 0    | 4.652586  | -1.481151 | 2.522991  |
| 14     | 6      | 0    | 3.277325  | -1.578536 | 2.688331  |
| 15     | 6      | 0    | 2.441273  | -0.765743 | 1.941709  |
| 16     | 6      | 0    | 2.948926  | 0.103049  | 0.977695  |
| 17     | 9      | 0    | 1.134790  | -0.816889 | 2.167761  |
| 18     | 9      | 0    | 2.770261  | -2.414637 | 3.587563  |
| 19     | 9      | 0    | 5.463417  | -2.240477 | 3.246657  |
| 20     | 9      | 0    | 6.493481  | -0.466736 | 1.473821  |
| 21     | 9      | 0    | 4.888921  | 1.104438  | 0.039048  |
| 22     | 6      | 0    | -0.901934 | 3.834459  | 0.055977  |
| 23     | 1      | 0    | -0.673488 | 3.371434  | 1.031286  |
| 24     | 8      | 0    | 0.029093  | 4.838473  | -0.244512 |
| 25     | 6      | 0    | 1.302292  | 4.316555  | -0.601385 |
| 26     | 1      | 0    | 1.473694  | 4.494730  | -1.670566 |
| 27     | 1      | 0    | 2.085025  | 4.824840  | -0.034312 |
| 28     | 6      | 0    | 1.415068  | 2.848534  | -0.334331 |
| 29     | 7      | 0    | 0.408873  | 1.956100  | -0.670246 |
| 30     | 7      | 0    | 2.415259  | 2.275049  | 0.235601  |
| 31     | 7      | 0    | 2.078887  | 0.954608  | 0.251085  |
| 32     | 6      | 0    | 0.875000  | 0.704091  | -0.341460 |
| 33     | 6      | 0    | -0.879999 | 2.673474  | -0.979108 |
| 34     | 1      | 0    | -0.741365 | 3.084046  | -1.988392 |
| 35     | 6      | 0    | -2.332266 | 4.340182  | 0.092438  |
| 36     | 1      | 0    | -2.588271 | 4.801675  | 1.048166  |
| 37     | 1      | 0    | -2.478695 | 5.083526  | -0.700148 |
| 38     | 6      | 0    | -1.748609 | -1.969286 | -0.394443 |
| 39     | 6      | 0    | -0.953032 | -0.910658 | 0.061911  |

|    |    |   |           |           |           |
|----|----|---|-----------|-----------|-----------|
| 40 | 6  | 0 | -1.416792 | -0.132703 | 1.124783  |
| 41 | 6  | 0 | -2.667706 | -0.366108 | 1.673447  |
| 42 | 6  | 0 | -3.470638 | -1.404170 | 1.224575  |
| 43 | 6  | 0 | -2.999310 | -2.192951 | 0.180563  |
| 44 | 1  | 0 | -0.812622 | 0.678708  | 1.516090  |
| 45 | 1  | 0 | -4.457166 | -1.571006 | 1.638863  |
| 46 | 35 | 0 | -3.325828 | 0.824174  | 2.986053  |
| 47 | 35 | 0 | -4.133545 | -3.492278 | -0.576812 |
| 48 | 8  | 0 | -1.352776 | -2.713360 | -1.458544 |
| 49 | 6  | 0 | -1.229300 | -1.926406 | -2.644477 |
| 50 | 1  | 0 | -1.219086 | -2.653738 | -3.458617 |
| 51 | 1  | 0 | -2.131741 | -1.318168 | -2.769413 |
| 52 | 6  | 0 | 1.179721  | -1.906274 | -3.046422 |
| 53 | 1  | 0 | 1.199184  | -2.922474 | -2.659653 |
| 54 | 6  | 0 | 2.284159  | -1.418078 | -3.736626 |
| 55 | 1  | 0 | 2.166607  | -0.606135 | -4.443344 |
| 56 | 1  | 0 | 3.094189  | -2.099377 | -3.972796 |
| 57 | 35 | 0 | 3.519880  | 0.075716  | -2.381886 |
| 58 | 6  | 0 | 0.057187  | -1.104714 | -2.727717 |
| 59 | 6  | 0 | -0.028532 | 0.242931  | -3.411162 |
| 60 | 1  | 0 | -0.145181 | 0.107746  | -4.493586 |
| 61 | 1  | 0 | -0.874510 | 0.841652  | -3.069070 |
| 62 | 1  | 0 | 0.896338  | 0.803089  | -3.239187 |
| 63 | 6  | 0 | 0.341645  | -0.636066 | -0.628379 |
| 64 | 8  | 0 | 1.283329  | -1.611486 | -0.335315 |
| 65 | 1  | 0 | 1.925046  | -1.614879 | -1.071742 |

---

**Int6R**

---

| Center<br>Number | Atomic<br>Number | Atomic<br>Type | Coordinates (Angstroms) |           |           |
|------------------|------------------|----------------|-------------------------|-----------|-----------|
|                  |                  |                | X                       | Y         | Z         |
| 1                | 6                | 0              | -5.523608               | -0.102466 | -1.485784 |
| 2                | 6                | 0              | -4.549259               | -0.774511 | -2.228046 |
| 3                | 6                | 0              | -3.257539               | -0.272570 | -2.312428 |
| 4                | 6                | 0              | -2.935173               | 0.892588  | -1.617181 |
| 5                | 6                | 0              | -3.936569               | 1.622696  | -0.966598 |
| 6                | 6                | 0              | -5.228484               | 1.109363  | -0.873591 |
| 7                | 1                | 0              | -6.522157               | -0.519908 | -1.409578 |
| 8                | 1                | 0              | -4.796147               | -1.702168 | -2.731908 |

|    |    |   |           |           |           |
|----|----|---|-----------|-----------|-----------|
| 9  | 1  | 0 | -2.522598 | -0.791572 | -2.915200 |
| 10 | 1  | 0 | -5.997696 | 1.666511  | -0.347206 |
| 11 | 6  | 0 | 4.068820  | 0.423680  | -1.336645 |
| 12 | 6  | 0 | 5.360709  | 0.224716  | -0.879936 |
| 13 | 6  | 0 | 5.696999  | 0.606675  | 0.410568  |
| 14 | 6  | 0 | 4.747584  | 1.170921  | 1.254262  |
| 15 | 6  | 0 | 3.454295  | 1.347079  | 0.799665  |
| 16 | 6  | 0 | 3.104625  | 0.935430  | -0.482039 |
| 17 | 9  | 0 | 2.536056  | 1.894421  | 1.583671  |
| 18 | 9  | 0 | 5.080495  | 1.520498  | 2.486814  |
| 19 | 9  | 0 | 6.928178  | 0.415380  | 0.848985  |
| 20 | 9  | 0 | 6.274509  | -0.308283 | -1.681845 |
| 21 | 9  | 0 | 3.768860  | 0.157858  | -2.606514 |
| 22 | 6  | 0 | -1.982703 | 2.960472  | -0.783286 |
| 23 | 1  | 0 | -1.502286 | 2.727207  | 0.177812  |
| 24 | 8  | 0 | -1.428418 | 4.147396  | -1.321306 |
| 25 | 6  | 0 | -0.258859 | 3.943746  | -2.105900 |
| 26 | 1  | 0 | -0.519121 | 3.937364  | -3.172170 |
| 27 | 1  | 0 | 0.431360  | 4.769603  | -1.925825 |
| 28 | 6  | 0 | 0.448319  | 2.672118  | -1.735816 |
| 29 | 7  | 0 | -0.247052 | 1.495958  | -1.500326 |
| 30 | 7  | 0 | 1.699354  | 2.552910  | -1.438072 |
| 31 | 7  | 0 | 1.812446  | 1.282035  | -0.978607 |
| 32 | 6  | 0 | 0.637420  | 0.621132  | -0.949557 |
| 33 | 6  | 0 | -1.716375 | 1.769931  | -1.734184 |
| 34 | 1  | 0 | -1.708229 | 2.136188  | -2.767288 |
| 35 | 6  | 0 | -3.492374 | 3.014689  | -0.578174 |
| 36 | 1  | 0 | -3.754690 | 3.282138  | 0.447988  |
| 37 | 1  | 0 | -3.931317 | 3.754615  | -1.256599 |
| 38 | 6  | 0 | -1.956542 | -1.592067 | 0.017669  |
| 39 | 6  | 0 | -1.002127 | -0.655295 | 0.412465  |
| 40 | 6  | 0 | -1.325384 | 0.315471  | 1.361033  |
| 41 | 6  | 0 | -2.607436 | 0.371509  | 1.873007  |
| 42 | 6  | 0 | -3.545141 | -0.612578 | 1.565498  |
| 43 | 6  | 0 | -3.202267 | -1.604950 | 0.665457  |
| 44 | 1  | 0 | -0.557078 | 1.010143  | 1.688939  |
| 45 | 1  | 0 | -4.534198 | -0.597541 | 2.007237  |
| 46 | 35 | 0 | -3.109643 | 1.824706  | 2.972651  |
| 47 | 35 | 0 | -4.430896 | -2.969916 | 0.267562  |
| 48 | 8  | 0 | -1.748685 | -2.481970 | -0.975539 |
| 49 | 6  | 0 | -0.583146 | -2.251873 | -1.756577 |

|    |    |   |           |           |           |
|----|----|---|-----------|-----------|-----------|
| 50 | 1  | 0 | -0.460448 | -3.140885 | -2.376895 |
| 51 | 1  | 0 | -0.749773 | -1.385191 | -2.416637 |
| 52 | 6  | 0 | 1.826988  | -1.901787 | -1.864360 |
| 53 | 1  | 0 | 1.686558  | -1.187167 | -2.678951 |
| 54 | 6  | 0 | 2.967918  | -2.580472 | -1.794401 |
| 55 | 1  | 0 | 3.749035  | -2.408228 | -2.528836 |
| 56 | 1  | 0 | 3.191617  | -3.269105 | -0.988245 |
| 57 | 35 | 0 | 3.896237  | -2.013210 | 1.387105  |
| 58 | 6  | 0 | 0.664819  | -2.024176 | -0.908437 |
| 59 | 6  | 0 | 0.795698  | -3.198155 | 0.071189  |
| 60 | 1  | 0 | 1.715287  | -3.147918 | 0.655308  |
| 61 | 1  | 0 | -0.049439 | -3.227901 | 0.761855  |
| 62 | 1  | 0 | 0.795895  | -4.128177 | -0.505254 |
| 63 | 6  | 0 | 0.435451  | -0.698682 | -0.107848 |
| 64 | 8  | 0 | 1.261763  | -0.536582 | 0.982127  |
| 65 | 1  | 0 | 2.122653  | -1.095055 | 1.001956  |

---

### Int6S

---

| Center<br>Number | Atomic<br>Number | Atomic<br>Type | Coordinates (Angstroms) |           |           |
|------------------|------------------|----------------|-------------------------|-----------|-----------|
|                  |                  |                | X                       | Y         | Z         |
| 1                | 6                | 0              | -5.047163               | 3.195354  | 0.030390  |
| 2                | 6                | 0              | -4.493329               | 1.924698  | -0.093937 |
| 3                | 6                | 0              | -3.112180               | 1.735842  | -0.003844 |
| 4                | 6                | 0              | -2.295885               | 2.837800  | 0.197579  |
| 5                | 6                | 0              | -2.860725               | 4.112429  | 0.387732  |
| 6                | 6                | 0              | -4.231273               | 4.297426  | 0.291450  |
| 7                | 1                | 0              | -6.121780               | 3.325361  | -0.042923 |
| 8                | 1                | 0              | -5.137239               | 1.065721  | -0.252248 |
| 9                | 1                | 0              | -2.696357               | 0.739163  | -0.073589 |
| 10               | 1                | 0              | -4.664731               | 5.281000  | 0.445553  |
| 11               | 6                | 0              | 4.060575                | 0.017868  | 0.418246  |
| 12               | 6                | 0              | 5.128909                | -0.860232 | 0.263078  |
| 13               | 6                | 0              | 4.918285                | -2.229151 | 0.296730  |
| 14               | 6                | 0              | 3.634667                | -2.726075 | 0.485535  |
| 15               | 6                | 0              | 2.575853                | -1.848898 | 0.650773  |
| 16               | 6                | 0              | 2.759473                | -0.468352 | 0.572275  |
| 17               | 9                | 0              | 1.371637                | -2.355137 | 0.867484  |
| 18               | 9                | 0              | 3.431256                | -4.038707 | 0.537750  |

|    |    |   |           |           |           |
|----|----|---|-----------|-----------|-----------|
| 19 | 9  | 0 | 5.938458  | -3.064380 | 0.154672  |
| 20 | 9  | 0 | 6.359487  | -0.382272 | 0.110268  |
| 21 | 9  | 0 | 4.334068  | 1.309247  | 0.443319  |
| 22 | 6  | 0 | -0.805652 | 4.103671  | 1.412589  |
| 23 | 1  | 0 | -1.271543 | 3.657862  | 2.308478  |
| 24 | 8  | 0 | 0.468686  | 4.565289  | 1.743434  |
| 25 | 6  | 0 | 1.093612  | 3.534797  | 2.479651  |
| 26 | 1  | 0 | 2.137047  | 3.805165  | 2.639820  |
| 27 | 1  | 0 | 0.598146  | 3.404947  | 3.452548  |
| 28 | 6  | 0 | 1.072060  | 2.249506  | 1.693820  |
| 29 | 7  | 0 | 0.137215  | 1.949043  | 0.702124  |
| 30 | 7  | 0 | 1.971110  | 1.343430  | 1.798166  |
| 31 | 7  | 0 | 1.682123  | 0.433398  | 0.807287  |
| 32 | 6  | 0 | 0.722690  | 0.951449  | -0.064064 |
| 33 | 6  | 0 | -0.790522 | 3.014976  | 0.317578  |
| 34 | 1  | 0 | -0.374253 | 3.461663  | -0.596842 |
| 35 | 6  | 0 | -1.800564 | 5.102039  | 0.830322  |
| 36 | 1  | 0 | -2.163049 | 5.827179  | 1.560764  |
| 37 | 1  | 0 | -1.342128 | 5.640978  | -0.007705 |
| 38 | 6  | 0 | -1.756361 | -1.779170 | -1.049847 |
| 39 | 6  | 0 | -0.958316 | -0.908281 | -0.295538 |
| 40 | 6  | 0 | -1.025483 | -0.981163 | 1.096559  |
| 41 | 6  | 0 | -1.842317 | -1.923094 | 1.705892  |
| 42 | 6  | 0 | -2.598561 | -2.820223 | 0.964774  |
| 43 | 6  | 0 | -2.556922 | -2.733050 | -0.418813 |
| 44 | 1  | 0 | -0.435017 | -0.332134 | 1.728480  |
| 45 | 1  | 0 | -3.224706 | -3.558644 | 1.450063  |
| 46 | 35 | 0 | -1.909190 | -1.998681 | 3.593001  |
| 47 | 35 | 0 | -3.616726 | -3.883158 | -1.462660 |
| 48 | 8  | 0 | -1.808348 | -1.657896 | -2.396770 |
| 49 | 6  | 0 | -1.894850 | -0.281309 | -2.750466 |
| 50 | 1  | 0 | -2.121979 | -0.255410 | -3.818100 |
| 51 | 1  | 0 | -2.728630 | 0.175907  | -2.202719 |
| 52 | 6  | 0 | 0.331120  | -0.014776 | -3.627711 |
| 53 | 1  | 0 | 0.281228  | -1.088274 | -3.797763 |
| 54 | 6  | 0 | 1.089019  | 0.738382  | -4.416935 |
| 55 | 1  | 0 | 1.203464  | 1.806695  | -4.271080 |
| 56 | 1  | 0 | 1.648807  | 0.288467  | -5.230732 |
| 57 | 35 | 0 | 2.193159  | 2.201706  | -1.533954 |
| 58 | 6  | 0 | -0.578908 | 0.478546  | -2.503422 |
| 59 | 6  | 0 | -0.937113 | 1.954118  | -2.710726 |

|    |   |   |           |           |           |
|----|---|---|-----------|-----------|-----------|
| 60 | 1 | 0 | -1.330479 | 2.054122  | -3.727228 |
| 61 | 1 | 0 | -1.724579 | 2.277056  | -2.032309 |
| 62 | 1 | 0 | -0.072184 | 2.605865  | -2.619442 |
| 63 | 6 | 0 | 0.043317  | -0.033430 | -1.077759 |
| 64 | 8 | 0 | 1.084347  | -0.924391 | -1.412127 |
| 65 | 1 | 0 | 1.720969  | -0.392084 | -1.928781 |

---

**TS7R**

---

| Center<br>Number | Atomic<br>Number | Atomic<br>Type | Coordinates (Angstroms) |           |           |
|------------------|------------------|----------------|-------------------------|-----------|-----------|
|                  |                  |                | X                       | Y         | Z         |
| 1                | 6                | 0              | -5.410345               | -0.244919 | -1.640398 |
| 2                | 6                | 0              | -4.363825               | -0.817102 | -2.368304 |
| 3                | 6                | 0              | -3.110729               | -0.216195 | -2.391265 |
| 4                | 6                | 0              | -2.902059               | 0.943780  | -1.647847 |
| 5                | 6                | 0              | -3.973945               | 1.568816  | -0.998647 |
| 6                | 6                | 0              | -5.226920               | 0.960367  | -0.971368 |
| 7                | 1                | 0              | -6.378169               | -0.734915 | -1.617283 |
| 8                | 1                | 0              | -4.526350               | -1.738382 | -2.916875 |
| 9                | 1                | 0              | -2.321609               | -0.642569 | -2.998280 |
| 10               | 1                | 0              | -6.052873               | 1.437286  | -0.452515 |
| 11               | 6                | 0              | 3.979547                | 0.502058  | -1.446573 |
| 12               | 6                | 0              | 5.279494                | 0.243476  | -1.041783 |
| 13               | 6                | 0              | 5.680530                | 0.587499  | 0.239584  |
| 14               | 6                | 0              | 4.784271                | 1.164220  | 1.129896  |
| 15               | 6                | 0              | 3.480328                | 1.387738  | 0.731108  |
| 16               | 6                | 0              | 3.063989                | 1.031823  | -0.548895 |
| 17               | 9                | 0              | 2.608151                | 1.918606  | 1.576600  |
| 18               | 9                | 0              | 5.171524                | 1.456146  | 2.364041  |
| 19               | 9                | 0              | 6.917132                | 0.327901  | 0.632612  |
| 20               | 9                | 0              | 6.139138                | -0.317446 | -1.886203 |
| 21               | 9                | 0              | 3.627938                | 0.253599  | -2.703933 |
| 22               | 6                | 0              | -2.113275               | 2.989811  | -0.639035 |
| 23               | 1                | 0              | -1.686105               | 2.670212  | 0.322630  |
| 24               | 8                | 0              | -1.571458               | 4.246503  | -1.001086 |
| 25               | 6                | 0              | -0.369595               | 4.174026  | -1.763096 |
| 26               | 1                | 0              | -0.596934               | 4.259988  | -2.832508 |
| 27               | 1                | 0              | 0.273510                | 5.007593  | -1.478313 |
| 28               | 6                | 0              | 0.377230                | 2.897793  | -1.509850 |

|    |    |   |           |           |           |
|----|----|---|-----------|-----------|-----------|
| 29 | 7  | 0 | -0.288261 | 1.683323  | -1.435890 |
| 30 | 7  | 0 | 1.634025  | 2.765809  | -1.240644 |
| 31 | 7  | 0 | 1.767557  | 1.435781  | -0.971154 |
| 32 | 6  | 0 | 0.609546  | 0.751071  | -1.035569 |
| 33 | 6  | 0 | -1.750064 | 1.912065  | -1.683864 |
| 34 | 1  | 0 | -1.754333 | 2.363604  | -2.682856 |
| 35 | 6  | 0 | -3.633672 | 2.966021  | -0.530237 |
| 36 | 1  | 0 | -3.977823 | 3.182870  | 0.483183  |
| 37 | 1  | 0 | -4.066392 | 3.706058  | -1.212706 |
| 38 | 6  | 0 | -1.939871 | -1.651949 | 0.020233  |
| 39 | 6  | 0 | -0.985874 | -0.726435 | 0.449947  |
| 40 | 6  | 0 | -1.324233 | 0.249204  | 1.388821  |
| 41 | 6  | 0 | -2.617756 | 0.312164  | 1.869447  |
| 42 | 6  | 0 | -3.559191 | -0.657956 | 1.527270  |
| 43 | 6  | 0 | -3.204358 | -1.648308 | 0.629787  |
| 44 | 1  | 0 | -0.566472 | 0.952455  | 1.721204  |
| 45 | 1  | 0 | -4.560423 | -0.631896 | 1.940586  |
| 46 | 35 | 0 | -3.130255 | 1.755822  | 2.975071  |
| 47 | 35 | 0 | -4.435253 | -2.999562 | 0.192500  |
| 48 | 8  | 0 | -1.704624 | -2.555776 | -0.952082 |
| 49 | 6  | 0 | -0.533970 | -2.323496 | -1.731347 |
| 50 | 1  | 0 | -0.400538 | -3.216388 | -2.342717 |
| 51 | 1  | 0 | -0.698713 | -1.463922 | -2.392542 |
| 52 | 6  | 0 | 1.870833  | -1.900430 | -1.807095 |
| 53 | 1  | 0 | 1.714515  | -1.158447 | -2.590858 |
| 54 | 6  | 0 | 3.026050  | -2.554977 | -1.752727 |
| 55 | 1  | 0 | 3.810096  | -2.339001 | -2.472736 |
| 56 | 1  | 0 | 3.250608  | -3.279976 | -0.979356 |
| 57 | 35 | 0 | 3.988198  | -2.004256 | 1.518572  |
| 58 | 6  | 0 | 0.702582  | -2.084634 | -0.870382 |
| 59 | 6  | 0 | 0.865265  | -3.274229 | 0.090195  |
| 60 | 1  | 0 | 1.765120  | -3.186378 | 0.699802  |
| 61 | 1  | 0 | 0.001705  | -3.360037 | 0.753407  |
| 62 | 1  | 0 | 0.931613  | -4.189770 | -0.503693 |
| 63 | 6  | 0 | 0.439035  | -0.817395 | -0.031707 |
| 64 | 8  | 0 | 1.285055  | -0.587419 | 0.987705  |
| 65 | 1  | 0 | 2.171330  | -1.072050 | 0.949104  |

---

**PR**

---



| Center<br>Number | Atomic<br>Number | Atomic<br>Type | Coordinates (Angstroms) |           |           |
|------------------|------------------|----------------|-------------------------|-----------|-----------|
|                  |                  |                | X                       | Y         | Z         |
| 1                | 6                | 0              | -0.455922               | 0.625137  | -0.110272 |
| 2                | 6                | 0              | -0.503262               | -0.775417 | -0.122318 |
| 3                | 6                | 0              | 0.674300                | -1.526805 | -0.082708 |
| 4                | 6                | 0              | 1.891861                | -0.878287 | -0.016307 |
| 5                | 6                | 0              | 1.958602                | 0.515799  | 0.018252  |
| 6                | 6                | 0              | 0.791646                | 1.259525  | -0.029791 |
| 7                | 1                | 0              | 0.599097                | -2.608543 | -0.093431 |
| 8                | 1                | 0              | 2.916733                | 1.018524  | 0.074783  |
| 9                | 35               | 0              | 3.497551                | -1.872268 | 0.037659  |
| 10               | 35               | 0              | 0.872233                | 3.138044  | 0.001472  |
| 11               | 8                | 0              | -1.564104               | 1.390743  | -0.160783 |
| 12               | 6                | 0              | -2.729300               | 0.743977  | -0.669092 |
| 13               | 1                | 0              | -3.545885               | 1.455448  | -0.535284 |
| 14               | 1                | 0              | -2.587400               | 0.558451  | -1.743260 |
| 15               | 6                | 0              | -4.241721               | -1.205590 | -0.586623 |
| 16               | 1                | 0              | -4.071190               | -1.597755 | -1.588245 |
| 17               | 6                | 0              | -5.453052               | -1.296705 | -0.050153 |
| 18               | 1                | 0              | -6.271169               | -1.749083 | -0.599593 |
| 19               | 1                | 0              | -5.674614               | -0.941618 | 0.951178  |
| 20               | 6                | 0              | -3.037205               | -0.569608 | 0.061789  |
| 21               | 6                | 0              | -3.210698               | -0.309619 | 1.564084  |
| 22               | 1                | 0              | -3.436245               | -1.244099 | 2.082698  |
| 23               | 1                | 0              | -2.303291               | 0.123361  | 1.991960  |
| 24               | 1                | 0              | -4.028660               | 0.396584  | 1.732777  |
| 25               | 6                | 0              | -1.818571               | -1.478059 | -0.112949 |
| 26               | 8                | 0              | -1.903384               | -2.683184 | -0.192544 |

**HBr**

| Center<br>Number | Atomic<br>Number | Atomic<br>Type | Coordinates (Angstroms) |          |           |
|------------------|------------------|----------------|-------------------------|----------|-----------|
|                  |                  |                | X                       | Y        | Z         |
| 1                | 35               | 0              | 0.000000                | 0.000000 | 0.039190  |
| 2                | 1                | 0              | 0.000000                | 0.000000 | -1.371653 |
